# Supplementary material for: Examining the latent structure and correlates of sensory reactivity in autism: a multi-site integrative data analysis by the autism sensory research consortium
Source: Springer Nature journal article supplement (doi:10.1186/s13229-023-00563-4), 2023-08-27
Supplement: MOESM1 [file 25971312]

**Examining the Latent Structure and Correlates of Sensory Reactivity in Autism:  
A Multi-site Integrative Data Analysis by the Autism Sensory Research Consortium**

Zachary J. Williams *et al.* (2023)

***Supplemental Information***

**Table of Contents**

|                                       |                   |
|---------------------------------------|-------------------|
| <b><i>Supplemental Methods</i></b>    | <b><i>S2</i></b>  |
| <b>Constructs and Measures</b>        | <b><i>S2</i></b>  |
| <b>Data Analysis</b>                  | <b><i>S7</i></b>  |
| <b><i>Supplemental Table S1</i></b>   | <b><i>S10</i></b> |
| <b><i>Supplemental Table S2</i></b>   | <b><i>S12</i></b> |
| <b><i>Supplemental Table S3</i></b>   | <b><i>S15</i></b> |
| <b><i>Supplemental Table S4</i></b>   | <b><i>S16</i></b> |
| <b><i>Supplemental Table S6</i></b>   | <b><i>S18</i></b> |
| <b><i>Supplemental Table S7</i></b>   | <b><i>S28</i></b> |
| <b><i>Supplemental References</i></b> | <b><i>S29</i></b> |

## Supplemental Methods

### Constructs and Measures

#### *Measures of Sensory Reactivity*

**(Short) Sensory Profile 1.** The Sensory Profile 1 (SP1; Dunn, 1999) is a 125-item caregiver-report questionnaire designed to assess a child’s sensory reactivity across multiple sensory modalities. Items are organized into four theoretically driven “sensory quadrants” (Low Registration [i.e., HYPO], Sensation Seeking [i.e., SEEK], Sensory Sensitivity [i.e., an aspect of HYPER in which an individual reports discomfort or aversion], and Sensation Avoiding [i.e., an aspect of HYPER in which an individual tends to display an “active” response and avoid the stimulus]). SP1 items are scored on a 5-point Likert scale ranging from 1=*Always* to 5=*Never*, with lower scores indicating a higher frequency of divergent (i.e., non-normative) sensory behaviors. An abbreviated version of the SP1, the Short Sensory Profile 1 (SSP1; McIntosh et al., 1999) is also available, comprising 38 of the original 125 SP1 items as rated on the same 5-point Likert scale. The SP1 and SSP1 were originally designed for children aged 3–10 years, although they are frequently administered to autistic children outside of that age range (Burns et al., 2017; Williams, 2020). Given its relative brevity and commercial availability, the SSP1 is among the most widely used measures of sensory reactivity in autism research to date (Burns et al., 2017; Williams, 2020), and its psychometric properties have been examined in multiple large samples of autistic children and youth (Dwyer et al., 2022; Parks et al., 2020; Tillmann et al., 2020; Tomchek et al., 2014; Williams et al., 2018). As the SP1/SSP1 were the only measures wherein lower scores indicated more significant divergence from a non-autistic sensory profile, items on the SP1/SSP1 were reverse-coded for analyses in order to be consistent in their scoring with the remainder of the sensory questionnaires.

**(Short) Sensory Profile 2.** The SP1 and SSP1 were revised by the measures' authors in 2014 to create the Sensory Profile 2 and Short Sensory Profile 2 (SP2 and SSP2; Dunn, 2014), the most recent iterations of these questionnaires. The SP2 and SSP2 are composed of 86 and 34 items, respectively, many of which are carried forward or minimally changed from the SP1, and all of which are rated on a 5-point Likert scale from 1 = *Almost Never* to 5 = *Almost Always*. Items are again organized into the four theoretically motivated sensory quadrants specified above. The recommended age range for the SP2 and SSP2 is 3–14 years (Dunn, 2014). Notably, as the SP2 and SSP2 have not been thoroughly validated in samples of autistic children, these measures are infrequently used in the autism literature (Lane et al., 2022; Schulz & Stevenson, 2019; Simpson et al., 2019), and many autism researchers continue to administer the SP1/SSP1 (Burns et al., 2017; Williams, 2020). In the current study, analogous items on the SP1 and SP2 (and their short forms) were combined into single items for the purpose of cross-dataset analyses.

**Sensory Experiences Questionnaire, version 2.1.** The Sensory Experiences Questionnaire version 2.1 (SEQ-2.1; Baranek, 1999) is a caregiver-report questionnaire that assesses a child's behavioral responses to a range of everyday sensory stimuli. The SEQ-2.1 includes 36 quantitative items that assess the frequency of a child's specific behaviors on a 5-point response scale ranging from 1 = *Almost Never* to 5 = *Almost Always*. Items are classified as representing one of three sensory response patterns (HYPER, HYPO, or SEEK), one of five sensory modality categories (Auditory, Visual, Tactile, Gustatory/Olfactory, and Vestibular/Proprioceptive), and one of two contexts (social and non-social). The SEQ-2.1 was designed for children 6 months through 6 years of age (Baranek, 1999; Baranek et al., 2006), although it has been administered to autistic individuals across a wider age range (Cascio et al., 2015, 2016; Donkers et al., 2015; Feldman et al., 2020; Foss-Feig et al., 2012). After the SP and

related measures, the SEQ-2.1 is the next most commonly used measure of sensory reactivity reported in the autism literature (Burns et al., 2017). The psychometric properties of the SEQ-2.1 have recently been comprehensively evaluated in a large community sample of young children (Lee et al., 2022), but formal factor-analytic investigations of this version of the SEQ in autism-only samples have not been published. However, some psychometric data have been published on an earlier version of the questionnaire with many overlapping items (SEQ-1.0; Baranek et al., 2006; Little et al., 2011), and existing studies incorporating the SEQ-2.1 in autistic individuals have found evidence of the measure’s convergent and concurrent validity in this population (e.g., Boyd et al., 2010; Feldman et al., 2021; Watson et al., 2011).

**Sensory Experiences Questionnaire, version 3.0.** The Sensory Experiences Questionnaire version 3.0 (SEQ-3.0; Ausderau et al., 2014; Baranek, 2009) is an updated version of the SEQ-2.1 that comprises 105 items, 97 of which are quantitative items rated on a 5-point scale ranging from 1 = *Never/Almost Never* to 5 = *Always/Almost Always* across four response patterns (HYPER, HYPO, SEEK, and enhanced perception [EP]), six modality categories (Auditory, Visual, Tactile, Gustatory/Olfactory, Vestibular/Proprioceptive, and Multisensory), and two contexts (social and nonsocial). This measure carries forward all items from the SEQ-2.1. It has been psychometrically evaluated in a large sample of autistic children ages 2–12 years (Ausderau et al., 2014), demonstrating preliminary support for a complex factor structure consisting of four domain factors and additional method factors reflecting sensory modalities and social contexts. Though all quantitative items on the SEQ-3.0 were considered for inclusion in the current study, analogous items on the SEQ-2.1 and SEQ-3.0 were combined into single items for the purpose of cross-dataset analysis.

### ***Measures of Putative Correlates***

**Cognitive Ability.** Verbal, nonverbal, and full-scale intelligence quotients (VIQ, NVIQ, and FSIQ, respectively) were assessed using various tests based on the studies from which each child participant was drawn. The majority of children (86.6%) in the combined cohort completed a cognitive assessment; specifically, participants were administered a Wechsler IQ measure (45.9%; e.g., the WASI-II; Wechsler, 2011), the Mullen Scales of Early Learning (19.0%; Mullen, 1995), a version of the Differential Ability Scales (12.6%; e.g., the DAS-II; Elliott, 2007), or a version of the Leiter International Performance Scale (9.1%; e.g., Leiter-3; Roid et al., 2013). When possible, standard scores for VIQ/NVIQ/FSIQ were used, but in cases wherein developmental quotients (DQs; e.g., based on the Mullen) were reported and/or tests were administered to children outside of the measure’s intended age range, DQ scores were utilized as reported or calculated using age-equivalent scores and chronological age information (i.e.,  $DQ = 100 \times \frac{\text{developmental age}}{\text{chronological age}}$ ). In addition to dimensional IQ scores, we also defined a dichotomous “Intellectual Disability” variable, defined as a FSIQ score < 70 or NVIQ < 70 in cases where no FSIQ was available (individuals with DQ scores only were excluded from this measure).

**Adaptive Behavior.** Adaptive behavior in the current study was measured via summary scores from the Vineland Adaptive Behavior Scales (VABS; Sparrow, 2011), including the first, second, and third editions of the measure. When available, standard scores from the VABS Communication (COM) domain, Daily Living Skills (DLS) domain, Socialization (SOC) domain, and Adaptive Behavior Composite (ABC) were analyzed. The majority of scores in the current sample were derived from the Vineland-II (56.1%; Sparrow et al., 2005) and Vineland-3 (41.5%; Sparrow et al., 2016).

**Core Autism Features.** Core autism features were predominantly measured using caregiver-report questionnaires. As these measures are not interchangeable or measured on the

same scale, we chose to only examine the most commonly used single measures in our sample, namely the Social Responsiveness Scale–School Age (SRS [including both the first and second editions]; Constantino et al., 2003; Constantino & Gruber, 2012) and the Repetitive Behavior Scale–Revised (RBS-R; Bodfish et al., 2000). For individuals with the SRS, we examined total raw scores only, as the SRS is largely unidimensional, assessing autism features as a single construct (Sturm et al., 2017). For the RBS-R, we calculated subscale scores based on the factor structure demonstrated by Bishop et al. (2013), examining the repetitive sensory motor (RSM), self-injurious behavior (SIB), ritualistic/sameness behavior, and compulsive behavior subscales in the current study. Notably, in our combined cohort, the ritualistic/sameness and compulsive subscales of the RBS-R correlated very highly (Pearson  $r = .751$ ); thus, the two scales were summed together (forming the “RSC” scale) in the current analysis of individual differences. The two-item restricted interests subscale was not examined due to its low reliability and poor content coverage of the larger trait domain of circumscribed interests (Nowell et al., 2021; Turner-Brown et al., 2011; Uljarević et al., 2021, 2023).

**Co-occurring Psychiatric Symptoms.** Co-occurring psychiatric symptoms were measured using a number of disorder-specific and transdiagnostic measures, although concordance across studies was somewhat more limited than with other clinical measures. In the current study, we opted to examine the broad trait domains of internalizing symptoms (INT), externalizing symptoms (EXT), total psychiatric symptoms (TOT), and features of attention deficit hyperactivity disorder (ADHD). The Achenbach System of Empirically Based Assessment (ASEBA; Achenbach, 2009) suite of measures, including the Child Behavior Checklist (CBCL) ages 1.5–5 and 6–18, was used in the majority of cases (75.7%). A minority of children had scores derived from a version of the Behavior Assessment System for Children

(BASC; Reynolds & Kamphaus, 2015) or the Conners 3<sup>rd</sup> Edition (Conners-3; used only as a measure of ADHD symptoms; Conners, 2008). Scores from all psychiatric symptom measures were analyzed on a common T-score metric ( $M = 50$ ,  $SD = 10$ ) to improve comparability across datasets.

## **Data Analysis**

### ***Sensory Subconstruct Refinement and Empirical Item Removal***

Subscale item refinement was conducted in the calibration sample using an iterative process based on hierarchical item clustering with the ICLUST algorithm (Cooksey & Soutar, 2006; Revelle, 1978), as implemented in the *psych R* package (Revelle, 2022). The ICLUST algorithm was first applied to the inter-item polychoric correlations of a given scale (based on pairwise complete data), and the resulting cluster structure was examined. Items or sub-clusters that, when added to the main cluster, significantly reduced the cluster's coefficient beta by  $\geq 0.1$  were iteratively removed (Rosenthal et al., 2021; Sapey-Triomphe et al., 2018), and item pairs that were much more strongly related to each other than all other indicators of a single-modality subconstruct (i.e., those with outlier correlations based on the MAD-median rule; Wilcox & Rousselet, 2018) were combined into single items to eliminate local dependency. The clustering process was repeated iteratively after removing or merging items until (a) the resulting scale formed a single cluster of at least three items and (b) no further items/subclusters were flagged for removal or consolidation.

After item removal, the resulting scale was tested for unidimensionality and reliability by being fit to a unidimensional graded response model (GRM; Samejima, 1969), a type of IRT model, which was subsequently evaluated in terms of global model fit (unidimensionality) and marginal reliability. Models were fit using marginal maximum likelihood based on the Bock-

Aitkin EM algorithm (Bock & Aitkin, 1981), as implemented in the *mirt* R package (Chalmers, 2012). Missing data within each GRM were handled using full-information maximum likelihood estimation. For models with four or more items, global fit was assessed using the limited-information  $C_2$  fit index (Cai & Monroe, 2014; Monroe & Cai, 2015) accompanied by  $C_2$ -based approximate fit indices, including the Tucker-Lewis index ( $TLI_{C_2}$ ; Cai et al., 2023), root mean square error of approximation ( $RMSEA_{C_2}$ ; Maydeu-Olivares & Joe, 2014), and standardized root-mean-square residual (SRMR; Maydeu-Olivares & Joe, 2014). For models with only three items, only the SRMR was calculated. Reliability was assessed using categorical coefficient omega (Green & Yang, 2009) and IRT-based marginal reliability (Samajima, 1994), and values of .70 or greater for both coefficients were judged to be acceptable for the current study.

Adequate model fit of a scale was defined as  $TLI_{C_2} > 0.97$ ,  $RMSEA_{C_2} < .089$ , and  $SRMR < .05$  (Cai et al., 2023; Maydeu-Olivares & Joe, 2014), and for three-item scales, adequate fit was defined as  $SRMR < .033$ . In cases where model fit was poor, additional items were removed if their residual correlations indicated significant local misfit (i.e., approximately  $r_{res} > 0.1$ ); this process was repeated until adequate model fit was achieved.

### ***Bifactor Modeling of Sensory Constructs***

First, to confirm the approximate simple structure of the data within each response pattern, we conducted exploratory graph analysis (EGA; based on the Golino et al., 2020 algorithm) on the inter-item polychoric correlations using the *EGAnet* R package (Golino & Christensen, 2020). This structure was confirmed by examining assignments of items to “communities” from the EGA procedure (based on the Walktrap algorithm; Christensen et al., 2023) to ensure that all items loaded with others from their same modality (with the exception of single-item subconstructs). Once the simple structure was confirmed, we fit the item-level data to



a bifactor GRM (Gibbons et al., 2007; Toland et al., 2017) using the *mirt* package's bifactor EM algorithm (Chalmers, 2012). Model fit was assessed using the limited-information  $M_2^*$  and  $M_2^*$ -based incremental fit indices (Maydeu-Olivares, 2013), with the same criteria for adequate fit as used for the unidimensional GRMs (i.e.,  $TLI_{M_2} > 0.97$ ,  $RMSEA_{M_2} < .089$ , and  $SRMR < .05$ , without substantial local misfit).

ASRC SENSORY INTEGRATIVE DATA ANALYSIS – SUPPLEMENTAL INFORMATION

**Supplemental Table S1**

*Participant demographics and broader characteristics for samples included in integrative data analysis*

|                                           | UNC               | VUMC1              | UCSF              | Syracuse          | UCLA              | Jefferson        | Reading           |
|-------------------------------------------|-------------------|--------------------|-------------------|-------------------|-------------------|------------------|-------------------|
| Sample Size                               | 104               | 181                | 35                | 55                | 67                | 93               | 37                |
| Age (years)                               | 6.77 ± 2.37 (104) | 10.14 ± 3.48 (181) | 10.21 ± 1.32 (35) | 11.86 ± 3.28 (55) | 13.75 ± 3.13 (67) | 7.05 ± 1.34 (93) | 8.68 ± 2.82 (37)  |
| Female Sex                                | 19 (18.3%)        | 25 (13.9%)         | 1 (2.9%)          | 14 (25.5%)        | 17 (25.4%)        | 9 (9.7%)         | 8 (21.6%)         |
| <b>Ethnicity</b>                          |                   |                    |                   |                   |                   |                  |                   |
| Hispanic or Latino                        | 0 (0%)            | 7 (3.9%)           | 0 (0%)            | 0 (0%)            | 15 (22.4%)        | 6 (6.5%)         | 0 (0%)            |
| Not Hispanic or Latino                    | 104 (100%)        | 150 (82.9%)        | 0 (0%)            | 52 (94.5%)        | 18 (26.9%)        | 86 (92.5%)       | 18 (48.6%)        |
| Not Reported or Unknown                   | 0 (0%)            | 24 (13.3%)         | 35 (100%)         | 3 (5.5%)          | 34 (50.7%)        | 1 (1.1%)         | 19 (51.4%)        |
| <b>Race</b>                               |                   |                    |                   |                   |                   |                  |                   |
| White                                     | 0 (0%)            | 142 (78.5%)        | 0 (0%)            | 50 (90.9%)        | 18 (26.9%)        | 79 (84.9%)       | 16 (43.2%)        |
| American Indian or Alaska Native          | 0 (0%)            | 3 (1.7%)           | 0 (0%)            | 0 (0%)            | 1 (1.5%)          | 0 (0%)           | 0 (0%)            |
| Asian                                     | 0 (0%)            | 4 (2.2%)           | 0 (0%)            | 1 (1.8%)          | 3 (4.5%)          | 3 (3.2%)         | 0 (0%)            |
| Black or African American                 | 0 (0%)            | 11 (6.1%)          | 0 (0%)            | 0 (0%)            | 2 (3.0%)          | 7 (7.5%)         | 0 (0%)            |
| Native Hawaiian or Other Pacific Islander | 0 (0%)            | 0 (0%)             | 0 (0%)            | 0 (0%)            | 0 (0%)            | 0 (0%)           | 0 (0%)            |
| More than One Race                        | 0 (0%)            | 13 (7.2%)          | 0 (0%)            | 3 (5.5%)          | 10 (14.9%)        | 0 (0%)           | 2 (5.4%)          |
| Not Reported or Unknown                   | 104 (100%)        | 8 (4.4%)           | 35 (100%)         | 1 (1.8%)          | 33 (49.3%)        | 4 (4.3%)         | 19 (51.4%)        |
| <b>Sensory Measures Administered</b>      |                   |                    |                   |                   |                   |                  |                   |
| SP1/ SSP1                                 | 102 (98.1%)       | 172 (95.0%)        | 35 (100%)         | 53 (96.4%)        | 67 (100%)         | 92 (98.9%)       | 19 (51.4%)        |
| SP2/ SSP2                                 | 0 (0%)            | 0 (0%)             | 0 (0%)            | 3 (5.5%)          | 0 (0%)            | 0 (0%)           | 18 (48.6%)        |
| SEQ Version 2.1                           | 42 (40.4%)        | 170 (93.9%)        | 0 (0%)            | 0 (0%)            | 0 (0%)            | 91 (97.8%)       | 0 (0%)            |
| SEQ Version 3.0                           | 59 (56.7%)        | 0 (0%)             | 0 (0%)            | 0 (0%)            | 0 (0%)            | 0 (0%)           | 0 (0%)            |
| <b>Cognitive Scores</b>                   |                   |                    |                   |                   |                   |                  |                   |
| Intelligence Quotient (IQ)                | 51 (49.0%)        | 154 (85.1%)        | 34 (97.1%)        | 48 (87.3%)        | 65 (97.0%)        | 87 (93.5%)       | 35 (94.6%)        |
| Developmental Quotient (DQ)               | 51 (49.0%)        | 18 (9.9%)          | 0 (0%)            | 0 (0%)            | 0 (0%)            | 0 (0%)           | 0 (0%)            |
| Neither                                   | 2 (1.9%)          | 9 (5.0%)           | 1 (2.9%)          | 7 (12.7%)         | 2 (3.0%)          | 6 (6.5%)         | 2 (5.4%)          |
| Full-scale IQ/DQ                          | 60.4 ± 17.0 (49)  | 93.1 ± 26.2 (171)  | 98.1 ± 16.1 (34)  | 103.0 ± 12.8 (48) | 104.6 ± 16.2 (65) | 97.0 ± 19.1 (83) | 106.6 ± 19.0 (28) |
| Verbal IQ/DQ                              | 52.4 ± 27.6 (49)  | 90.8 ± 27.4 (172)  | 101.4 ± 21.2 (34) | 99.3 ± 15.1 (48)  | 101.4 ± 17.8 (65) | 97.4 ± 18.7 (81) | n.r.              |
| Nonverbal IQ/DQ                           | 72.4 ± 27.0 (98)  | 95.4 ± 24.8 (170)  | 102.1 ± 15.6 (34) | 106.4 ± 14.0 (48) | 107.4 ± 17.1 (65) | 98.1 ± 18.1 (84) | n.r.              |
| <b>Adaptive Functioning</b>               |                   |                    |                   |                   |                   |                  |                   |
| Vineland ABC                              | 59.8 ± 16.0 (102) | n.r.               | n.r.              | 73.7 ± 12.3 (29)  | 77.6 ± 14.7 (59)  | 78.3 ± 11.0 (88) | n.r.              |
| Vineland COM                              | 69.5 ± 22.6 (102) | n.r.               | n.r.              | 79.1 ± 16.0 (29)  | 79.1 ± 15.3 (59)  | 85.1 ± 13.5 (92) | n.r.              |
| Vineland DLS                              | 56.6 ± 17.2 (100) | n.r.               | n.r.              | 79.9 ± 16.7 (29)  | 83.2 ± 17.3 (59)  | 82.2 ± 12.2 (92) | n.r.              |
| Vineland SOC                              | 65.4 ± 13.5 (101) | n.r.               | n.r.              | 67.1 ± 12.1 (29)  | 75.9 ± 17.3 (59)  | 75.8 ± 13.3 (92) | n.r.              |
| <b>Psychiatric Symptoms</b>               |                   |                    |                   |                   |                   |                  |                   |
| TOTAL                                     | 60.1 ± 8.7 (71)   | n.r.               | n.r.              | 68.9 ± 10.7 (51)  | 64.6 ± 7.8 (23)   | n.r.             | n.r.              |
| INT                                       | 57.4 ± 10.0 (71)  | n.r.               | n.r.              | 63.8 ± 17.2 (51)  | 62.2 ± 10.8 (23)  | n.r.             | n.r.              |
| EXT                                       | 54.5 ± 9.0 (71)   | n.r.               | n.r.              | 57.5 ± 10.5 (51)  | 57.0 ± 10.6 (23)  | n.r.             | n.r.              |

Values are presented as *n* (%) for categorical variables and *M* ± *SD* (*n*) for continuous variables. Cognitive scores (derived from measures including various Wechsler IQ scales (Wechsler, 2011), the Mullen Scales of Early Learning (Mullen, 1995), a version of the Differential Ability Scales (Elliott, 2007), or a version of the Leiter International Performance Scale (Roid et al., 2013) in the majority of cases) and adaptive functioning scores (derived from the Vineland Adaptive Behavior Scales; Sparrow, 2011) are presented as standard scores (*M* = 100, *SD* = 15). Psychiatric symptom scores (derived from the Achenbach System of Empirically Based Assessment (Achenbach, 2009) or a version of the Behavior Assessment System for Children (Reynolds & Kamphaus, 2015)) are presented as T-scores (*M* = 50, *SD* = 10). Values of “n.r.” indicate that a score was not reported in a given study. SP = Sensory Profile; SSP = Short Sensory Profile; SEQ = Sensory Experiences Questionnaire; ABC = Adaptive Behavior Composite; COM = Communication; DLS = Daily Living Skills; SOC = Socialization; INT = Internalizing Symptoms; EXT = Externalizing Symptoms; UNC = University of North Carolina; VUMC = Vanderbilt University Medical Center; UCSF = University of California San Francisco; UCLA = University of California Los Angeles; Jefferson = Thomas Jefferson University [some participants also recruited from Albert Einstein College of Medicine]; Reading = University of Reading [some participants also recruited from Mount Sinai School of Medicine].

ASRC SENSORY INTEGRATIVE DATA ANALYSIS – SUPPLEMENTAL INFORMATION

Supplemental Table S1 (Continued)

|                                           | KKI               | VUMC2              | NDAR              | SEP                | SPARK              | Full Sample        |
|-------------------------------------------|-------------------|--------------------|-------------------|--------------------|--------------------|--------------------|
| Sample Size                               | 47                | 114                | 741               | 1285               | 1107               | 3866               |
| Age (years)                               | 10.47 ± 1.34 (47) | 11.14 ± 3.78 (114) | 9.33 ± 3.95 (741) | 7.78 ± 2.65 (1285) | 7.58 ± 3.04 (1107) | 8.41 ± 3.36 (3866) |
| Female Sex                                | 5 (10.6%)         | 22 (19.3%)         | 165 (22.3%)       | 232 (18.1%)        | 191 (17.3%)        | 793 (20.5%)        |
| <b>Ethnicity</b>                          |                   |                    |                   |                    |                    |                    |
| Hispanic or Latino                        | 0 (0%)            | 9 (7.9%)           | 59 (8.0%)         | 0 (0%)             | 188 (17.0%)        | 284 (7.3%)         |
| Not Hispanic or Latino                    | 0 (0%)            | 89 (78.1%)         | 518 (69.9%)       | 3 (0.2%)           | 919 (83.0%)        | 1957 (50.6%)       |
| Not Reported or Unknown                   | 47 (100%)         | 16 (14.0%)         | 164 (22.1%)       | 1282 (99.8%)       | 0 (0%)             | 1625 (42.0%)       |
| <b>Race</b>                               |                   |                    |                   |                    |                    |                    |
| White                                     | 35 (74.5%)        | 83 (72.8%)         | 501 (67.6%)       | 1091 (84.9%)       | 904 (81.7%)        | 2919 (75.5%)       |
| American Indian or Alaska Native          | 0 (0%)            | 0 (0%)             | 0 (0%)            | 7 (0.5%)           | 30 (2.7%)          | 41 (1.1%)          |
| Asian                                     | 0 (0%)            | 2 (1.8%)           | 35 (4.7%)         | 16 (1.2%)          | 42 (3.8%)          | 106 (2.7%)         |
| Black or African American                 | 7 (14.9%)         | 6 (5.3%)           | 36 (4.9%)         | 37 (2.9%)          | 3 (0.3%)           | 109 (2.8%)         |
| Native Hawaiian or Other Pacific Islander | 0 (0%)            | 0 (0%)             | 2 (0.3%)          | 2 (0.2%)           | 0 (0%)             | 4 (0.1%)           |
| More than One Race                        | 5 (10.6%)         | 8 (7.0%)           | 48 (6.5%)         | 101 (7.9%)         | 89 (8.0%)          | 279 (7.2%)         |
| Not Reported or Unknown                   | 0 (0%)            | 15 (13.2%)         | 119 (16.1%)       | 31 (2.4%)          | 39 (3.5%)          | 408 (10.6%)        |
| <b>Sensory Measures Administered</b>      |                   |                    |                   |                    |                    |                    |
| SP1/ SSP1                                 | 0 (0%)            | 114 (100%)         | 466 (62.9%)       | 453 (35.3%)        | 0 (0%)             | 1573 (40.0%)       |
| SP2/ SSP2                                 | 0 (0%)            | 0 (0%)             | 272 (36.7%)       | 0 (0%)             | 0 (0%)             | 293 (7.6%)         |
| SEQ Version 2.1                           | 0 (0%)            | 101 (88.6%)        | 29 (3.9%)         | 0 (0%)             | 0 (0%)             | 433 (11.2%)        |
| SEQ Version 3.0                           | 47 (100%)         | 0 (0%)             | 0 (0%)            | 1285 (100%)        | 1107 (100%)        | 2498 (64.6%)       |
| <b>Cognitive Scores</b>                   |                   |                    |                   |                    |                    |                    |
| Intelligence Quotient (IQ)                | 45 (95.7%)        | 100 (87.7%)        | 386 (52.1%)       | 3 (0.2%)           | 34 (3.1%)          | 1042 (27.0%)       |
| Developmental Quotient (DQ)               | 0 (0%)            | 0 (0%)             | 161 (21.7%)       | 1 (0.1%)           | 16 (1.4%)          | 247 (6.4%)         |
| Neither                                   | 2 (4.3%)          | 14 (12.3%)         | 194 (26.2%)       | 1281 (99.7%)       | 1057 (95.5%)       | 2577 (66.7%)       |
| Full-scale IQ/DQ                          | 97.9 ± 15.6 (47)  | n.r.               | 91.1 ± 25.0 (460) | n.r.               | 74.8 ± 26.4 (42)   | 92.1 ± 24.5 (1028) |
| Verbal IQ/DQ                              | 98.9 ± 16 (47)    | n.r.               | 86.0 ± 29.1 (512) | n.r.               | 85.6 ± 26.9 (29)   | 88.8 ± 27.9 (1038) |
| Nonverbal IQ/DQ                           | 103.2 ± 15.2 (47) | 105.9 ± 18.1 (100) | 88.4 ± 28.0 (513) | 73.7 ± 40.3 (3)    | 91.5 ± 25.9 (31)   | 93.0 ± 26.0 (1193) |
| <b>Adaptive Functioning</b>               |                   |                    |                   |                    |                    |                    |
| Vineland ABC                              | n.r.              | n.r.               | 67.7 ± 16.0 (602) | 55.5 ± 29.1 (4)    | 71.2 ± 15.9 (588)  | 69.7 ± 16.1 (1472) |
| Vineland COM                              | n.r.              | 78.5 ± 13.5 (111)  | 72.0 ± 18.7 (605) | 60.3 ± 35.1 (4)    | 71.6 ± 21.1 (588)  | 73.3 ± 19.6 (1590) |
| Vineland DLS                              | n.r.              | 81.4 ± 17.6 (111)  | 68.0 ± 19.2 (466) | 54.0 ± 28.4 (4)    | 73.8 ± 17.9 (588)  | 72.3 ± 19.1 (1449) |
| Vineland SOC                              | n.r.              | 71.6 ± 13.2 (111)  | 67.4 ± 16.7 (605) | 62.0 ± 24.1 (4)    | 68.7 ± 18.8 (588)  | 68.8 ± 17.1 (1589) |
| <b>Psychiatric Symptoms</b>               |                   |                    |                   |                    |                    |                    |
| TOTAL                                     | n.r.              | 69.5 ± 12.9 (102)  | 62.2 ± 9.4 (420)  | 54.8 ± 5.6 (4)     | n.r.               | 63.6 ± 10.4 (671)  |
| INT                                       | n.r.              | 58.7 ± 11.6 (102)  | 60.1 ± 11.6 (514) | 51.3 ± 12.1 (4)    | n.r.               | 59.9 ± 11.9 (765)  |
| EXT                                       | n.r.              | 61.3 ± 14.4 (102)  | 55.7 ± 12.1 (515) | 51.3 ± 7.8 (4)     | n.r.               | 56.5 ± 12.2 (766)  |

Values are presented as *n* (%) for categorical variables and *M* ± *SD* (*n*) for continuous variables. Cognitive scores (derived from measures including various Wechsler IQ scales (Wechsler, 2011), the Mullen Scales of Early Learning (Mullen, 1995), a version of the Differential Ability Scales (Elliott, 2007), or a version of the Leiter International Performance Scale (Roid et al., 2013) in the majority of cases) and adaptive functioning scores (derived from the Vineland Adaptive Behavior Scales; Sparrow, 2011) are presented as standard scores (*M* = 100, *SD* = 15). Psychiatric symptom scores (derived from the Achenbach System of Empirically Based Assessment (Achenbach, 2009) or a version of the Behavior Assessment System for Children (Reynolds & Kamphaus, 2015)) are presented as T-scores (*M* = 50, *SD* = 10). Values of “n.r.” indicate that a score was not reported in a given study. SP = Sensory Profile; SSP = Short Sensory Profile; SEQ = Sensory Experiences Questionnaire; ABC = Adaptive Behavior Composite; COM = Communication; DLS = Daily Living Skills; SOC = Socialization; INT = Internalizing Symptoms; EXT = Externalizing Symptoms; KKI = Kennedy-Krieger Institute; VUMC = Vanderbilt University Medical Center; NDAR = National Database for Autism Research; SEP = Sensory Experiences Project; SPARK = Simons Powering Autism Research for Knowledge (RM0035Woyanowski).

ASRC SENSORY INTEGRATIVE DATA ANALYSIS – SUPPLEMENTAL INFORMATION

**Supplemental Table S2**

*Relevant sensory questionnaire items organized by subconstruct (Page 1 of 3)*

| Item(s)                               | Summary of Item Content <sup>a</sup>                                                                                | Included | %Missing<br>(Calibration/Full) |
|---------------------------------------|---------------------------------------------------------------------------------------------------------------------|----------|--------------------------------|
| <b>Auditory HYPER</b>                 |                                                                                                                     |          |                                |
| SP1 Q1/SP2 Q1                         | Negative response to unexpected/loud noises                                                                         | Yes*     | 12.2% / 55.7%                  |
| SP1 Q2/SP2 Q2                         | Covers ears with hands to protect against sound                                                                     | Yes*     | 12.3% / 55.7%                  |
| SP1 Q3/SP2 Q3                         | Trouble completing tasks with TV/music/radio in background                                                          | Yes      | 1.1% / 52.4%                   |
| SP1 Q4/SP2 Q4                         | Trouble functioning/focusing with significant background noise                                                      | Yes      | 0.3% / 52.0%                   |
| SP1 Q5/SP2 Q5                         | Difficulty working/being productive with background noise                                                           | Yes      | 12.7% / 55.9%                  |
| SEQ2 Q1/SEQ3 Q1                       | Easily startled by unexpected/loud noises                                                                           | Yes*     | 22.4% / 24.3%                  |
| SEQ2 Q6/SEQ3 Q10                      | Startle response/covers ears due to loud conversations/singing                                                      | No       | 22.3% / 24.3%                  |
| SEQ2 Q5/SEQ3 Q3                       | Notices environmental sounds (planes, trains, thunder) before others                                                | No       | 22.3% / 24.2%                  |
| SEQ3 Q2                               | Noise making/humming to tune out or avoid sounds                                                                    | No       | 57.4% / 35.4%                  |
| SEQ3 Q9                               | Bothered by everyday sounds (dishwasher, radio, etc.) that don't bother others                                      | Yes*     | 57.4% / 35.5%                  |
| <b>Visual HYPER</b>                   |                                                                                                                     |          |                                |
| SP1 Q9/SP2 Q9                         | Prefers to be/play/work in low-light/dark settings                                                                  | No       | 18.7% / 62.8%                  |
| SP1 Q10/SP2 Q15                       | Bothered by and/or avoidance of bright lights                                                                       | Yes      | 18.2% / 62.6%                  |
| SP1 Q14/SP2 Q13                       | Bothered by bright lights more than/for longer than other children                                                  | Yes      | 13.3% / 56.2%                  |
| SEQ2 Q8/SEQ3 Q15                      | Disturbed by bright lights inside or brightness outside                                                             | Yes      | 22.5% / 24.5%                  |
| SEQ2 Q11/SEQ3 Q18                     | Avoidance of gaze towards parent's face during social games/play                                                    | No       | 22.5% / 24.5%                  |
| SP1 Q11                               | Happy to be in the dark                                                                                             | No       | 29.5% / 66.1%                  |
| SP1 Q15                               | Squinting/covering of eyes to protect from light                                                                    | Yes      | 24.4% / 59.4%                  |
| SP1 Q96                               | Avoids eye contact                                                                                                  | No       | 29.4% / 66.1%                  |
| SEQ3 Q33                              | Visual distraction due to objects in motion around him/her                                                          | No       | 57.4% / 36.0%                  |
| <b>Tactile HYPER</b>                  |                                                                                                                     |          |                                |
| SP1 Q30/SP2 Q16/<br>SEQ2 Q15/SEQ3 Q49 | Distress shown during grooming (crying/fighting)                                                                    | Yes*     | 0.3% / 0.9%                    |
| SP1 Q34/SP2 Q17                       | Becomes irritated by wearing socks or shoes                                                                         | Yes      | 18.3% / 62.6%                  |
| SP1 Q36/SP2 Q18                       | Emotional/aggressive reaction to being touched                                                                      | Yes*     | 13.7% / 56.2%                  |
| SP1 Q39/SP2 Q20                       | Rubs/scratches part of body that has been touched                                                                   | Yes      | 14.0% / 56.2%                  |
| SEQ2 Q14/SEQ3 Q36                     | Dislike of being held or cuddled                                                                                    | No       | 22.6% / 24.9%                  |
| SEQ2 Q16/SEQ3 Q38                     | Avoidance of touching certain textures (like fuzzy/squishy toys) or playing with messy materials (like sand/lotion) | Yes*     | 22.6% / 24.9%                  |
| SEQ2 Q17/SEQ3 Q51                     | Aversion towards being touched by another person                                                                    | Yes      | 22.6% / 25.1%                  |
| SEQ2 Q18/SEQ3 Q40                     | Trouble adjusting to bath/shower water temperature or aversion to being in water                                    | No       | 22.7% / 25.0%                  |
| SEQ2 Q20/SEQ3 Q52                     | Dislikes being tickled                                                                                              | No       | 22.6% / 25.1%                  |
| SP1 Q29                               | Avoidance of getting messy (playing with sand, glue, etc.)                                                          | Yes      | 29.5% / 66.1%                  |
| SP1 Q32                               | Showing discomfort (crying/fighting) towards dental work/toothbrushing                                              | Yes      | 29.5% / 66.1%                  |
| SP1 Q33                               | Sensitivity to certain fabrics (particularly certain clothes/bedsheets)                                             | Yes*     | 29.6% / 66.1%                  |
| SP1 Q35                               | Avoidance of going barefoot, especially in sand/grass                                                               | No       | 24.6% / 59.4%                  |
| SP1 Q37                               | Withdrawal from splashing water                                                                                     | No       | 24.6% / 59.4%                  |
| SEQ3 Q44                              | Aversion/sensitivity towards sticky materials (like tape, band-aids)                                                | Yes      | 57.4% / 36.1%                  |
| SEQ3 Q46                              | Bothered by tags or seams on clothing                                                                               | Yes      | 57.4% / 36.1%                  |
| SEQ3 Q47                              | Bothered by tight clothing (like turtlenecks, stocking caps)                                                        | Yes      | 57.4% / 36.1%                  |
| SEQ3 Q54                              | Negative reaction to haircuts                                                                                       | Yes      | 57.4% / 36.1%                  |
| <b>Olfactory HYPER</b>                |                                                                                                                     |          |                                |
| SEQ3 Q61                              | Aversion/sensitivity to the way people smell                                                                        | Yes      | 57.4% / 36.2%                  |
| SEQ3 Q66                              | Noticing smells before other people do                                                                              | Yes      | 57.4% / 36.3%                  |
| SEQ3 Q73                              | Gagging in response to certain smells                                                                               | Yes      | 57.4% / 36.3%                  |
| <b>Gustatory HYPER</b>                |                                                                                                                     |          |                                |
| SP1 Q54/SP2 Q43                       | Easily gags due to certain food textures/utensils in mouth                                                          | No       | 18.1% / 62.6%                  |
| SP1 Q55/SP2 Q44                       | Rejects/avoids certain food tastes/smells typically found in children's diet                                        | Yes      | 12.9% / 55.8%                  |
| SP1 Q56/SP2 Q45                       | Will only eat certain tastes (like sweet, salty, etc.)                                                              | Yes      | 13.6% / 56.1%                  |
| SP1 Q57/SP2 Q46                       | Limits self to particular food textures/temperatures                                                                | No       | 13.5% / 56.0%                  |
| SP1 Q58/SP2 Q47                       | Picky eater, especially about food textures                                                                         | No       | 13.0% / 55.9%                  |
| SEQ2 Q22/SEQ3 Q59                     | Refuses to try new foods or avoids certain food tastes/smells/textures                                              | Yes      | 22.6% / 25.1%                  |
| SEQ3 Q63                              | Seems to be a picky eater                                                                                           | No       | 57.4% / 36.2%                  |
| SEQ3 Q70                              | Able to taste the difference in subtle modifications to food (brand swap, recipe change)                            | Yes      | 57.4% / 36.3%                  |
| SEQ3 Q72                              | Refusal to eat food that he/she usually likes if it is mixed with another food                                      | No       | 57.4% / 36.2%                  |

Table continues on following page

ASRC SENSORY INTEGRATIVE DATA ANALYSIS – SUPPLEMENTAL INFORMATION

Supplemental Table S2 (Continued; Page 2 of 3)

| Item(s)                         | Summary of Item Content <sup>a</sup>                                                          | Included | %Missing      |
|---------------------------------|-----------------------------------------------------------------------------------------------|----------|---------------|
| <b>Movement HYPER</b>           |                                                                                               |          |               |
| SEQ2 Q29/SEQ3 Q77               | Seems uneasy/becomes dizzy when moving (like on a swing/rocking chair)                        | No       | 22.6% / 25.2% |
| SP1 Q18                         | Becomes anxious/distressed when his/her feet leave the ground                                 | Yes      | 24.5% / 59.4% |
| SP1 Q19                         | Dislikes activities where his/her head is upside down (like somersaults, roughhousing)        | Yes      | 24.5% / 59.5% |
| SP1 Q20                         | Avoids playground equipment/moving toys (like swings, merry-go-rounds)                        | Yes      | 29.3% / 66.0% |
| SP1 Q21                         | Dislikes riding in a car                                                                      | No       | 29.4% / 66.1% |
| SP1 Q23                         | Becomes disoriented (falls or dizziness) after bending over sink/table                        | No       | 29.6% / 66.1% |
| SP1 Q77                         | Fears falling or heights                                                                      | No       | 24.5% / 59.4% |
| SP1 Q78                         | Avoids climbing/jumping or bumpy/uneven ground                                                | No       | 29.4% / 66.3% |
| SEQ3 Q81                        | Avoids riding on escalators, elevators, or other moving surfaces                              | No       | 57.4% / 36.3% |
| SEQ3 Q83                        | Negatively reacts to being moved quickly by a familiar adult                                  | Yes      | 57.4% / 36.3% |
| <b>Auditory HYPO</b>            |                                                                                               |          |               |
| SP1 Q6/SP2 Q6                   | Appears to tune you out/not hear what you say/ignore you                                      | Yes      | 0.3% / 52.2%  |
| SP1 Q7/SP2 Q7                   | Doesn't hear/respond when name is called although hearing is OK                               | Yes      | 12.6% / 55.8% |
| SEQ2 Q4/SEQ3 Q4                 | Seems to ignore or tune-out loud noises (for example, no reaction when alarm goes off)        | No       | 22.3% / 24.3% |
| SEQ2 Q3/SEQ3 Q8                 | Ignores you when you call his/her name                                                        | Yes      | 22.3% / 24.3% |
| SEQ3 Q14                        | Trouble distinguishing between different types of sound                                       | No       | 57.4% / 35.4% |
| <b>Visual HYPO</b>              |                                                                                               |          |               |
| SP1 Q99/SEQ2 Q12/SEQ3 Q31       | Doesn't notice/ignores new or different people when they enter the room                       | No       | 22.2% / 12.8% |
| SEQ2 Q10/SEQ3 Q22 /SEQ3 Q23     | Slowness in noticing new objects/toys entering the room even when placed near him/her         | Yes      | 22.5% / 24.5% |
| SEQ3 Q34                        | Trouble distinguishing between different types of visual sensations                           | No       | 57.4% / 36.1% |
| <b>Tactile HYPO</b>             |                                                                                               |          |               |
| SP1 Q42/SP2 Q23/SP2 Q24         | Unaware of pain or temperature changes                                                        | Yes      | 18.2% / 25.1% |
| SP1 Q46/SP2 Q26                 | Doesn't seem to notice (oblivious to) when face or hands are messy                            | No       | 12.8% / 25.0% |
| SEQ2 Q19/SEQ3 Q53               | Slow to react to pain (for example, not being bothered by scrapes, cuts, falls)               | Yes      | 22.6% / 62.6% |
| SEQ2 Q21/SEQ3 Q43               | Ignores/doesn't notice you when you tap him/her on shoulder for attention                     | No       | 22.6% / 58.7% |
| SP1 Q31                         | Prefers long-sleeved clothing in warm weather or short sleeves in cold weather                | No       | 24.9% / 59.5% |
| SP1 Q43                         | Seems not to notice when someone touches his/her arm or back                                  | No       | 29.4% / 66.1% |
| SP1 Q53                         | Leaves clothing twisted on body                                                               | No       | 24.5% / 59.4% |
| SEQ3 Q56                        | Unawareness of extreme temperatures (hot or cold)                                             | Yes      | 57.4% / 36.1% |
| SEQ3 Q58                        | Trouble distinguishing between different types of touch sensations                            | No       | 57.4% / 36.2% |
| <b>Olfactory HYPO</b>           |                                                                                               |          |               |
| SP1 Q125                        | Does not seem to smell strong odors                                                           | Yes      | 29.7% / 66.2% |
| SEQ3 Q69                        | Unawareness of strong or unpleasant smells that most people notice                            | Yes      | 57.4% / 36.2% |
| <b>Gustatory HYPO</b>           |                                                                                               |          |               |
| SEQ3 Q74                        | Trouble distinguishing between different types of tastes or flavors                           | Yes      | 57.4% / 36.3% |
| <b>Auditory SEEK</b>            |                                                                                               |          |               |
| SP1 Q8/SP2 Q8                   | Enjoys strange noises or seeks to make noise for noise's sake/fun                             | No       | 12.7% / 55.7% |
| SEQ2 Q36a/SEQ3 Q7               | Extreme fascination with sounds                                                               | Yes      | 36.0% / 28.8% |
| SEQ3 Q11                        | Fascination/excitement towards the sound of others singing                                    | No       | 57.4% / 35.4% |
| <b>Visual SEEK</b>              |                                                                                               |          |               |
| SP1 Q97/SP2 Q80/SP2 Q81         | Stares intensely at objects/people                                                            | Yes      | 18.0% / 62.5% |
| SEQ2 Q9/SEQ3 Q17                | Stares at lights/objects that spin or move                                                    | Yes      | 22.5% / 24.6% |
| SEQ2 Q36b/SEQ3 Q21              | Extreme fascination with lights                                                               | No       | 36.0% / 28.9% |
| SP1 Q16                         | Looks carefully/intensely at objects/people (staring)                                         | No       | 29.3% / 66.1% |
| SEQ3 Q16                        | Fascination with his/her own reflection in another person's eyes                              | No       | 57.4% / 35.7% |
| SEQ3 Q19                        | Fascination/excitement due to the visual effect of water falling, swirling, or pouring        | Yes      | 57.4% / 35.8% |
| SEQ3 Q25                        | Looking at objects using side vision or out of the corner of his/her eyes                     | No       | 57.4% / 36.0% |
| SEQ3 Q27                        | Watching objects that he/she moves rapidly in front of his/her eyes                           | Yes      | 57.4% / 36.0% |
| SEQ3 Q28                        | Fascination/excitement due to his/her reflection in shiny surfaces (like mirrors, sunglasses) | No       | 57.4% / 36.0% |
| SEQ3 Q29                        | Looking at angles or corners of objects (like a table leg)                                    | Yes      | 57.4% / 36.0% |
| SEQ3 Q30                        | Fascination/excitement due to flickering or scrolling motions on a computer screen/TV         | Yes      | 57.4% / 36.0% |
| SEQ3 Q32                        | Watching his/her hands or fingers move/flicker in front of the eyes                           | No       | 57.4% / 36.0% |
| <b>Tactile SEEK</b>             |                                                                                               |          |               |
| SP1 Q40/SP1 Q45/SP2 Q21/SP2 Q25 | Touches people and objects to the point of irritating others, more so than same-aged children | Yes      | 29.6% / 66.1% |
| SP1 Q41/SP2 Q22                 | Displays unusual need for touching certain toys, surfaces, or textures                        | No       | 24.5% / 59.4% |
| SEQ2 Q36f/SEQ3 Q45              | Extreme fascination with touch                                                                | Yes      | 29.6% / 66.1% |
| SEQ2 Q36e/SEQ3 Q55              | Extreme fascination with textures of surfaces, objects, or clothing fabrics                   | No       | 29.6% / 66.1% |
| SP1 Q44                         | Avoids wearing shoes; loves being barefoot                                                    | No       | 24.5% / 59.4% |
| SEQ3 Q37                        | Craves intense or firm touch (like firm hugs, squeezes, back scratches)                       | Yes      | 29.6% / 66.1% |
| SEQ3 Q39                        | Enjoys air blowing from fans or wind on his/her face                                          | No       | 29.6% / 66.1% |
| SEQ3 Q41                        | Craves being tickled                                                                          | No       | 24.5% / 59.4% |
| SEQ3 Q50                        | Touches/rubs certain surfaces/materials (grooves, ridges, smooth surfaces)                    | Yes      | 29.6% / 66.1% |
| SEQ3 Q57                        | Rubs wet substances (lotion, water, soap) onto a tabletop or another smooth surface           | No       | 29.6% / 66.1% |

Table continues on following page

ASRC SENSORY INTEGRATIVE DATA ANALYSIS – SUPPLEMENTAL INFORMATION

Supplemental Table S2 (Continued; Page 3 of 3)

| Item(s)                  | Summary of Item Content <sup>a</sup>                                                               | Included | %Missing      |
|--------------------------|----------------------------------------------------------------------------------------------------|----------|---------------|
| <b>Olfactory SEEK</b>    |                                                                                                    |          |               |
| SP1 Q59/SP2 Q48          | Routinely smells non-food objects                                                                  | No       | 18.3% / 62.7% |
| SEQ2 Q23/SEQ3 Q60        | Smells objects or toys during play or other activities                                             | No       | 22.6% / 25.1% |
| SEQ2 Q36c/SEQ3 Q67       | Extreme fascination with particular smells                                                         | Yes      | 36.0% / 29.5% |
| SP1 Q60                  | Strongly prefers certain smells                                                                    | No       | 29.7% / 66.3% |
| SP1 Q124                 | Deliberately smells objects                                                                        | No       | 29.7% / 66.2% |
| <b>Gustatory SEEK</b>    |                                                                                                    |          |               |
| SP1 Q61/SP2 Q49          | Strongly prefers certain tastes                                                                    | No       | 5.9% / 58.9%  |
| SEQ2 Q36d/SEQ3 Q65       | Extreme fascination with particular tastes                                                         | No       | 36.0% / 29.5% |
| SP1 Q62                  | Craves certain foods                                                                               | No       | 29.5% / 66.2% |
| SP1 Q63                  | Seeks out certain tastes/smells                                                                    | No       | 29.8% / 66.3% |
| SEQ3 Q64                 | Craves foods with a strong taste or flavor (like spicy, sour, or bitter foods)                     | Yes      | 57.4% / 36.2% |
| <b>Oral Tactile SEEK</b> |                                                                                                    |          |               |
| SEQ2 Q25/SEQ3 Q62        | Puts objects, toys, or other non-food items in his/her mouth to lick, suck, chew, or explore       | Yes      | 22.6% / 25.1% |
| SP1 Q64                  | Chews or licks nonfood objects                                                                     | Yes      | 29.5% / 66.2% |
| SP1 Q65                  | Mouths objects (like pencils, hands)                                                               | Yes      | 29.5% / 66.1% |
| SEQ3 Q68                 | Mouths, sucks, or chews on his/her own hands or fingers                                            | No       | 57.4% / 36.3% |
| SEQ3 Q71                 | Licks non-food objects                                                                             | Yes      | 57.4% / 36.2% |
| <b>Movement SEEK</b>     |                                                                                                    |          |               |
| SP1 Q24/SP1 Q25/SP2 Q27  | Pursual of all kinds of movement activities which interferes with daily routines (can't sit still) | Yes      | 0.6% / 52.0%  |
| SP1 Q27/SP1 Q28/SP2 Q28  | Unconscious rocking possibly in desk/chair/on floor/while standing                                 | No       | 6.9% / 25.2%  |
| SP1 Q83/SP2 Q32          | Seeks out opportunities to fall without regard for personal safety                                 | No       | 18.6% / 59.1% |
| SP1 Q84/SP2 Q60          | Appears to enjoy falling                                                                           | Yes      | 18.5% / 24.4% |
| SEQ2 Q27/SEQ3 Q76        | Likes to jump up/down, rock back/forth, or spin in circles                                         | Yes      | 22.6% / 62.8% |
| SEQ2 Q28/SEQ3 Q78        | Seeks out physical rough-housing play (like being tossed in air or spun)                           | No       | 22.6% / 62.7% |
| SEQ2 Q30/SEQ3 Q80        | Flaps his/her arms or hands repeatedly, particularly when excited                                  | No       | 22.6% / 25.2% |
| SP1 Q26                  | Twirls/spins self frequently throughout the day (enjoys dizziness)                                 | Yes      | 29.5% / 66.1% |
| SEQ3 Q79                 | Enjoys being upside-down                                                                           | No       | 57.4% / 36.5% |
| SEQ3 Q85                 | Adopts unusual postures with his/her hands, fingers, or arms                                       | No       | 57.4% / 36.3% |

Items included in the final operationalization of a given subconstruct (including single-item indicators) are shaded gray in the table. For Auditory HYPER and Tactile HYPER (in which both unidimensional and bifactor solutions were examined due to the presence of a viable bifactor model for the single-modality construct), the items that were included in the unidimensional composite score are marked with a \*. HYPER = hyperreactivity; HYPO = hyporeactivity; SEEK = sensory seeking; SP1 = Sensory Profile 1 (Dunn, 1999); SP2 = Sensory Profile 2 (Dunn, 2014); SEQ2 = Sensory Experiences Questionnaire, version 2.1 (Baranek, 1999); SEQ3 = Sensory Experiences Questionnaire, version 3.0 (Ausderau et al., 2014; Baranek, 2009).

<sup>a</sup> Item content summaries have been adapted with permission from original measures with permission from the original copyright holders. To access the verbatim item content, interested parties are encouraged to contact the copyright holders directly (Grace Baranek [SEQ2/SEQ3] and NCS Pearson, Inc. [SP1/SP2]).

**Supplemental Table S3**

*Specifications of hierarchical Bayesian integrative data analysis models*

|                                                                                                                          | <b>Continuous Outcome Model</b>                                                                                                                                                                                                                                                                                                                                                                                                                                                                                                                                                                                                                                               | <b>Binary Outcome Model</b>                                                                                                                                                                                                                                                                                                                                                                                                                                                                                                                                                                                                                                                                                                             |
|--------------------------------------------------------------------------------------------------------------------------|-------------------------------------------------------------------------------------------------------------------------------------------------------------------------------------------------------------------------------------------------------------------------------------------------------------------------------------------------------------------------------------------------------------------------------------------------------------------------------------------------------------------------------------------------------------------------------------------------------------------------------------------------------------------------------|-----------------------------------------------------------------------------------------------------------------------------------------------------------------------------------------------------------------------------------------------------------------------------------------------------------------------------------------------------------------------------------------------------------------------------------------------------------------------------------------------------------------------------------------------------------------------------------------------------------------------------------------------------------------------------------------------------------------------------------------|
| <p><b>Prior and Likelihood Specifications</b></p> <p>Outcome variables are standardized (<math>M = 0, SD = 1</math>)</p> | $y_i \sim t(\mu, \sigma, \nu)$ $\mu_i = \beta_{0,id} + \beta_{1,id}x_i$ $\begin{bmatrix} \beta_{0,id} \\ \beta_{1,id} \end{bmatrix} = \text{MVNormal} \left( \begin{bmatrix} \beta_0 \\ \beta_1 \end{bmatrix}, \Sigma \right)$ $\Sigma = \begin{pmatrix} \sigma_{\beta_0} & 0 \\ 0 & \sigma_{\beta_1} \end{pmatrix} \Omega \begin{pmatrix} \sigma_{\beta_0} & 0 \\ 0 & \sigma_{\beta_1} \end{pmatrix}$ $\beta_0 \sim t_3(0, 2.5)$ $\beta_1 \sim \text{Normal}(0, 0.5)$ $\nu \sim \text{Gamma}(2, 0.1)_{lb=1}$ $\sigma_{\beta_0} \sim \text{Half-}t_3(0, 2.5)$ $\sigma_{\beta_1} \sim \text{Half-}t_3(0, 2.5)$ $\log(\sigma) \sim t_3(0, 2.5)$ $\Omega \sim \text{LKJcorr}(2)$ | $y_i \sim t(\mu, \sigma, \nu)$ $\mu_i = \beta_{0,id} + \beta_{1,id}x_i$ $\begin{bmatrix} \beta_{0,id} \\ \beta_{1,id} \end{bmatrix} = \text{MVNormal} \left( \begin{bmatrix} \beta_0 \\ \beta_1 \end{bmatrix}, \Sigma \right)$ $\Sigma = \begin{pmatrix} \sigma_{\beta_0} & 0 \\ 0 & \sigma_{\beta_1} \end{pmatrix} \Omega \begin{pmatrix} \sigma_{\beta_0} & 0 \\ 0 & \sigma_{\beta_1} \end{pmatrix}$ $\beta_0 \sim t_3(0, 2.5)$ $\beta_1 \sim \text{Normal}(0, 1)$ $\nu \sim \text{Gamma}(2, 0.1)_{lb=1}$ $\sigma_{\beta_0} \sim \text{Half-}t_3(0, 2.5)$ $\sigma_{\beta_1} \sim \text{Half-}t_3(0, 2.5)$ $\log(\sigma_{x=0}) \sim \text{Normal}(0, 1)$ $\log(\sigma_{x=1}) \sim \text{Normal}(0, 1)$ $\Omega \sim \text{LKJcorr}(2)$ |
| <p><b>Effect Size Parameter</b></p>                                                                                      | $r = \frac{\beta_1}{\sqrt{\beta_1^2 + 1}}$ <p><b>ROPE</b> (<math>\mathcal{H}_0</math>): <math>r = [-0.1, 0.1]</math></p> <p><b>Prior scale:</b> ~50% density in <math>r = [-0.32, 0.32]</math><br/> ~95% density in <math>r = [-0.70, 0.70]</math><br/> Prior <math>P(\mathcal{H}_0) \approx 16\%</math></p>                                                                                                                                                                                                                                                                                                                                                                  | $d = \frac{\beta_1}{\sqrt{\frac{\sigma_{x=0}^2 + \sigma_{x=1}^2}{2}}}$ <p><b>ROPE</b> (<math>\mathcal{H}_0</math>): <math>d = [-0.2, 0.2]</math></p> <p><b>Prior scale:</b> ~50% density in <math>d = [-0.45, 0.45]</math><br/> ~95% density in <math>d = [-2.50, 2.50]</math><br/> Prior <math>P(\mathcal{H}_0) \approx 15\%</math></p>                                                                                                                                                                                                                                                                                                                                                                                                |
| <p><b>Heterogeneity Parameters</b></p>                                                                                   | $\tau^2 = \sigma_{\beta_1}^2$ $I^2 = 100 \times \frac{\tau^2}{\tau^2 + \text{VAR}(\beta_1)}$ $\text{ICC} = \frac{\tau^2 + \sigma_{\beta_0}^2}{\tau^2 + \sigma_{\beta_0}^2 + \sigma^2}$                                                                                                                                                                                                                                                                                                                                                                                                                                                                                        | $\tau^2 = \sigma_{\beta_1}^2$ $I^2 = 100 \times \frac{\tau^2}{\tau^2 + \text{VAR}(\beta_1)}$ $\text{ICC} = \frac{\tau^2 + \sigma_{\beta_0}^2}{\tau^2 + \sigma_{\beta_0}^2 + \sqrt{\frac{\sigma_{x=0}^2 + \sigma_{x=1}^2}{2}}}$                                                                                                                                                                                                                                                                                                                                                                                                                                                                                                          |
| <p><b>MCMC Specifications</b></p>                                                                                        | <p>Markov Chains: 10<br/> Iterations Per Chain: 2,500<br/> Warmup Iterations: 1,000<br/> 10 datasets (1 per plausible value)</p>                                                                                                                                                                                                                                                                                                                                                                                                                                                                                                                                              | <p>Markov Chains: 10<br/> Iterations Per Chain: 2,500<br/> Warmup Iterations: 1,000<br/> 10 datasets (1 per plausible value)</p>                                                                                                                                                                                                                                                                                                                                                                                                                                                                                                                                                                                                        |

Integrative data analysis models were fit as hierarchical Student- $t$  regressions with random slope and intercept terms by data source (i.e., study sample). All outcomes were standardized prior to fitting. ROPE = Region of Practical Equivalence; MCMC = Markov Chain Monte Carlo.

**Supplemental Table S4***Final bifactor structure of auditory hyperreactivity (HYPER) items*

| Item                         | G     | S <sub>1</sub> | <i>h</i> <sup>2</sup> | <i>I-ECV</i> |
|------------------------------|-------|----------------|-----------------------|--------------|
| SP1 Q1/SP2 Q1                | 0.886 | —              | 0.786                 | 1.000        |
| SP1 Q2/SP2 Q2                | 0.852 | —              | 0.726                 | 1.000        |
| SP1 Q3/SP2 Q3                | 0.329 | 0.842          | 0.817                 | 0.132        |
| SP1 Q4/SP2 Q4                | 0.451 | 0.620          | 0.588                 | 0.346        |
| SP1 Q5/SP2 Q5                | 0.455 | 0.520          | 0.478                 | 0.434        |
| SEQ2 Q1/SEQ3 Q1              | 0.878 | —              | 0.771                 | 1.000        |
| SEQ3 Q9                      | 0.726 | 0.220          | 0.575                 | 0.916        |
| <b>Bifactor Coefficients</b> |       |                |                       |              |
| $\omega_T/\omega_S$          | 0.945 | 0.874          |                       |              |
| $\omega_H/\omega_{HS}$       | 0.759 | 0.491          |                       |              |
| <i>ECV</i> <sub>G</sub>      | 0.702 | 0.425          |                       |              |
| <i>ECV</i> <sub>SS</sub>     | —     | 0.575          |                       |              |

Factor loadings are derived from full-information maximum likelihood confirmatory bifactor analysis, equivalent to a bifactor graded response model. All loadings are fully standardized, based on latent traits with means of 0 and standard deviations of 1 in the (autistic) population. G and S<sub>1</sub> columns represent the general and specific factors, respectively. For this model, the general factor represents the overall Auditory hyperreactivity (HYPER) construct, whereas the specific factor is interpreted as “auditory distractibility and intolerance of background noise.” SP = Sensory Profile; SEQ = Sensory Experiences Questionnaire; *h*<sup>2</sup> = communality; *I-ECV* = item explained common variance; *ECV*<sub>G</sub> = General factor explained common variance;  $\omega_T$  = Coefficient omega total (total score reliability;  $\geq 0.8$  indicates high reliability);  $\omega_S$  = Coefficient omega subscale (subscale reliability;  $> 0.8$  indicates high reliability);  $\omega_H$  = Coefficient omega hierarchical (general factor saturation;  $\omega_H \geq 0.8$  or combination of  $\omega_H \geq 0.7$  and *ECV*<sub>G</sub>  $\geq 0.60$  indicates strong general factor);  $\omega_{HS}$  = Coefficient omega hierarchical subscale (specific factor saturation;  $\geq 0.20/0.25$  support the added value of a specific factor under conditions of high/low reliability, respectively); *ECV*<sub>SS</sub> = Specific factor explained common variance for a subscale ( $\geq 0.30/0.45$  support the added value of a specific factor under conditions of high/low reliability, respectively).



**Supplemental Table S5***Final bifactor structure of tactile hyperreactivity (HYPER) items*

| <b>Item</b>                           | <b>G</b> | <b>S<sub>1</sub></b> | <b>S<sub>2</sub></b> | <b>S<sub>3</sub></b> | <b>S<sub>4</sub></b> | <b><i>h</i><sup>2</sup></b> | <b><i>I-ECV</i></b> |
|---------------------------------------|----------|----------------------|----------------------|----------------------|----------------------|-----------------------------|---------------------|
| SP1 Q30/SP2 Q16/<br>SEQ2 Q15/SEQ3 Q49 | 0.595    | —                    | —                    | 0.649                | —                    | 0.775                       | 0.457               |
| SP1 Q34/SP2 Q17                       | 0.703    | —                    | 0.266                | —                    | —                    | 0.565                       | 0.875               |
| SP1 Q36/SP2 Q18                       | 0.713    | —                    | —                    | —                    | 0.575                | 0.840                       | 0.606               |
| SP1 Q39/SP2 Q20                       | 0.654    | —                    | —                    | —                    | 0.362                | 0.559                       | 0.765               |
| SEQ2 Q16/SEQ3 Q38                     | 0.613    | 0.610                | —                    | —                    | —                    | 0.748                       | 0.502               |
| SEQ2 Q17/SEQ3 Q51                     | 0.596    | —                    | —                    | —                    | 0.511                | 0.616                       | 0.577               |
| SP1 Q29                               | 0.399    | 0.777                | —                    | —                    | —                    | 0.763                       | 0.209               |
| SP1 Q32                               | 0.565    | —                    | —                    | 0.490                | —                    | 0.560                       | 0.571               |
| SP1 Q33                               | 0.758    | —                    | 0.449                | —                    | —                    | 0.777                       | 0.740               |
| SEQ3 Q44                              | 0.540    | 0.384                | —                    | —                    | —                    | 0.439                       | 0.664               |
| SEQ3 Q46                              | 0.633    | —                    | 0.678                | —                    | —                    | 0.860                       | 0.465               |
| SEQ3 Q47                              | 0.653    | —                    | 0.447                | —                    | —                    | 0.626                       | 0.681               |
| SEQ3 Q54                              | 0.390    | —                    | —                    | 0.565                | —                    | 0.472                       | 0.323               |
| <b>Bifactor Coefficients</b>          |          |                      |                      |                      |                      |                             |                     |
| $\omega_T/\omega_S$                   | 0.946    | 0.823                | 0.886                | 0.789                | 0.839                |                             |                     |
| $\omega_H/\omega_{HS}$                | 0.789    | 0.450                | 0.270                | 0.420                | 0.283                |                             |                     |
| $ECV_G$                               | 0.563    | 0.424                | 0.670                | 0.457                | 0.641                |                             |                     |
| $ECV_{SS}$                            | —        | 0.576                | 0.330                | 0.543                | 0.359                |                             |                     |

Factor loadings are derived from full-information maximum likelihood confirmatory bifactor analysis, equivalent to a bifactor graded response model. All loadings are fully standardized, based on latent traits with means of 0 and standard deviations of 1 in the (autistic) population. G and S<sub>1-4</sub> columns represent the general and specific factors, respectively. For this model, the general factor represents the overall Tactile hyperreactivity (HYPER) construct, specific factor S<sub>1</sub> is interpreted as “avoidance of messy/sticky textures,” specific factor S<sub>2</sub> is interpreted as “distress/irritation caused by clothing,” specific factor S<sub>3</sub> is interpreted as “difficulty/distress with grooming,” and specific factor S<sub>4</sub> is interpreted as “aversive/defensive reactions to (social) touch.” SP = Sensory Profile; SEQ = Sensory Experiences Questionnaire; *h*<sup>2</sup> = communality; *I-ECV* = item explained common variance;  $ECV_G$  = General factor explained common variance;  $\omega_T$  = Coefficient omega total (total score reliability;  $\geq 0.8$  indicates high reliability);  $\omega_S$  = Coefficient omega subscale (subscale reliability;  $> 0.8$  indicates high reliability);  $\omega_H$  = Coefficient omega hierarchical (general factor saturation;  $\omega_H \geq 0.8$  or combination of  $\omega_H \geq 0.7$  and  $ECV_G \geq 0.60$  indicates strong general factor);  $\omega_{HS}$  = Coefficient omega hierarchical subscale (specific factor saturation;  $\geq 0.20/0.25$  support the added value of a specific factor under conditions of high/low reliability, respectively);  $ECV_{SS}$  = Specific factor explained common variance for a subscale ( $\geq 0.30/0.45$  support the added value of a specific factor under conditions of high/low reliability, respectively).

**Supplemental Table S6**

*Meta-analytic effects and heterogeneity parameters for continuous correlates (Page 1 of 10)*

| <b>Correlations with SRS Total Score (Overall Autistic Traits)</b>    |                  |                 |                           |                                |                                      |             |                                      |                                       |                         |                            |
|-----------------------------------------------------------------------|------------------|-----------------|---------------------------|--------------------------------|--------------------------------------|-------------|--------------------------------------|---------------------------------------|-------------------------|----------------------------|
| <b>Sensory Construct</b>                                              | <b>Correlate</b> | <b><i>n</i></b> | <b><i>r</i> [95% CrI]</b> | <b><i>P</i><sub>ROPE</sub></b> | <b>log(<i>BF</i><sub>ROPE</sub>)</b> | <b>Sig*</b> | <b><math>\tau^2</math> [95% CrI]</b> | <b><i>I</i><sup>2</sup> [95% CrI]</b> | <b>ICC [95% CrI]</b>    | <b>95% PI for <i>r</i></b> |
| HYPER General                                                         | SRS              | 628             | 0.256<br>[0.073, 0.422]   | 0.050                          | 1.289                                | SIG+        | 0.063<br>[3e-08, 0.203]              | 86.6%<br>[59.4, 98.4]                 | 0.157<br>[0.047, 0.325] | [-0.280, 0.689]            |
| HYPER Auditory                                                        | SRS              | 626             | 0.184<br>[0.032, 0.342]   | 0.131                          | 0.242                                | INC         | 0.042<br>[6e-10, 0.138]              | 85.8%<br>[50.5, 98.5]                 | 0.065<br>[0.001, 0.174] | [-0.256, 0.603]            |
| HYPER Visual                                                          | SRS              | 481             | 0.254<br>[0.084, 0.398]   | 0.039                          | 1.524                                | SIG+        | 0.019<br>[6e-12, 0.123]              | 70.9%<br>[0.0, 94.1]                  | 0.231<br>[0.074, 0.466] | [-0.142, 0.595]            |
| HYPER Tactile                                                         | SRS              | 625             | 0.247<br>[0.064, 0.407]   | 0.055                          | 1.182                                | SIG+        | 0.055<br>[2e-10, 0.190]              | 85.6%<br>[39.5, 98.6]                 | 0.169<br>[0.052, 0.335] | [-0.260, 0.686]            |
| HYPER Gustatory                                                       | SRS              | 482             | 0.216<br>[0.056, 0.375]   | 0.066                          | 0.991                                | INC         | 0.022<br>[9e-13, 0.130]              | 73.9%<br>[3.5, 97.5]                  | 0.076<br>[0.003, 0.212] | [-0.163, 0.601]            |
| HYPER Movement                                                        | SRS              | 356             | 0.205<br>[0.008, 0.396]   | 0.118                          | 0.347                                | INC         | 0.027<br>[3e-12, 0.198]              | 70.2%<br>[0.0, 94.6]                  | 0.057<br>[0.000, 0.223] | [-0.251, 0.647]            |
| HYPO Speech                                                           | SRS              | 624             | 0.231<br>[0.104, 0.363]   | 0.024                          | 2.063                                | SIG+        | 0.021<br>[3e-12, 0.096]              | 80.5%<br>[10.2, 98.3]                 | 0.063<br>[0.000, 0.171] | [-0.128, 0.559]            |
| HYPO Pain/Temp                                                        | SRS              | 480             | 0.169<br>[0.022, 0.318]   | 0.163                          | -0.016                               | INC         | 0.013<br>[1e-12, 0.093]              | 68.4%<br>[0.0, 93.7]                  | 0.179<br>[0.051, 0.390] | [-0.172, 0.503]            |
| SEEK Visual                                                           | SRS              | 481             | 0.150<br>[-0.019, 0.312]  | 0.264                          | -0.632                               | INC         | 0.017<br>[2e-12, 0.115]              | 69.3%<br>[0.0, 93.7]                  | 0.101<br>[0.003, 0.267] | [-0.235, 0.519]            |
| SEEK Tactile                                                          | SRS              | 614             | 0.172<br>[0.033, 0.295]   | 0.156                          | 0.024                                | INC         | 0.007<br>[6e-12, 0.055]              | 57.6%<br>[0.0, 91.6]                  | 0.070<br>[0.010, 0.178] | [-0.115, 0.421]            |
| SEEK Oral Tactile                                                     | SRS              | 385             | 0.128<br>[-0.090, 0.322]  | 0.352                          | -1.048                               | INC         | 0.039<br>[2e-11, 0.232]              | 77.6%<br>[6.4, 98.6]                  | 0.055<br>[0.000, 0.223] | [-0.403, 0.600]            |
| SEEK Movement                                                         | SRS              | 622             | 0.161<br>[0.030, 0.295]   | 0.181                          | -0.165                               | INC         | 0.011<br>[6e-12, 0.065]              | 68.7%<br>[0.0, 92.8]                  | 0.045<br>[0.000, 0.132] | [-0.152, 0.446]            |
| <b>Correlations with RBS-R RSM (Lower-order Repetitive Behaviors)</b> |                  |                 |                           |                                |                                      |             |                                      |                                       |                         |                            |
| <b>Sensory Construct</b>                                              | <b>Correlate</b> | <b><i>n</i></b> | <b><i>r</i> [95% CrI]</b> | <b><i>P</i><sub>ROPE</sub></b> | <b>log(<i>BF</i><sub>ROPE</sub>)</b> | <b>Sig*</b> | <b><math>\tau^2</math> [95% CrI]</b> | <b><i>I</i><sup>2</sup> [95% CrI]</b> | <b>ICC [95% CrI]</b>    | <b>95% PI for <i>r</i></b> |
| HYPER General                                                         | RBS-R RSM        | 1587            | 0.251<br>[0.136, 0.378]   | 0.011                          | 2.806                                | SIG++       | 0.005<br>[1e-13, 0.068]              | 54.4%<br>[0.0, 94.0]                  | 0.096<br>[0.018, 0.252] | [-0.010, 0.520]            |
| HYPER Auditory                                                        | RBS-R RSM        | 1585            | 0.256<br>[0.069, 0.414]   | 0.049                          | 1.293                                | SIG+        | 0.029<br>[1e-10, 0.156]              | 76.7%<br>[5.4, 97.9]                  | 0.144<br>[0.017, 0.371] | [-0.188, 0.640]            |
| HYPER Visual                                                          | RBS-R RSM        | 1442            | 0.232<br>[0.074, 0.444]   | 0.043                          | 1.433                                | SIG+        | 0.026<br>[6e-11, 0.203]              | 69.8%<br>[9.1, 98.6]                  | 0.117<br>[0.011, 0.335] | [-0.193, 0.669]            |
| HYPER Tactile                                                         | RBS-R RSM        | 1565            | 0.245<br>[0.152, 0.348]   | 0.003                          | 4.193                                | SIG++       | 0.004<br>[7e-13, 0.045]              | 55.3%<br>[0.0, 94.0]                  | 0.087<br>[0.012, 0.238] | [0.027, 0.463]             |
| HYPER Gustatory                                                       | RBS-R RSM        | 1423            | 0.146<br>[0.015, 0.334]   | 0.239                          | -0.503                               | INC         | 0.009<br>[3e-13, 0.109]              | 54.4%<br>[0.0, 93.3]                  | 0.132<br>[0.017, 0.367] | [-0.158, 0.516]            |
| HYPER Olfactory                                                       | RBS-R RSM        | 1076            | 0.076<br>[-0.608, 0.647]  | 0.232                          | -0.470                               | INC         | 0.618<br>[3e-10, 15.344]             | 80.3%<br>[2.5, 99.9]                  | 0.834<br>[0.194, 0.995] | [-0.933, 0.997]            |
| HYPER Movement                                                        | RBS-R RSM        | 1409            | 0.107<br>[-0.032, 0.221]  | 0.432                          | -1.378                               | ZERO+       | 0.003<br>[2e-13, 0.060]              | 40.1%<br>[0.0, 93.3]                  | 0.043<br>[0.000, 0.192] | [-0.162, 0.352]            |
| HYPO Speech                                                           | RBS-R RSM        | 1583            | 0.331<br>[0.191, 0.488]   | 0.002                          | 4.516                                | SIG++       | 0.038<br>[0.002, 0.149]              | 81.5%<br>[51.7, 97.8]                 | 0.107<br>[0.016, 0.262] | [-0.081, 0.690]            |
| HYPO Pain/Temp                                                        | RBS-R RSM        | 1268            | 0.220<br>[-0.112, 0.405]  | 0.129                          | 0.254                                | INC         | 0.017<br>[3e-13, 0.327]              | 48.4%<br>[0.0, 94.7]                  | 0.260<br>[0.016, 0.618] | [-0.416, 0.637]            |
| SEEK Visual                                                           | RBS-R RSM        | 1282            | 0.357<br>[-0.019, 0.555]  | 0.055                          | 1.191                                | SIG+        | 0.024<br>[8e-11, 0.477]              | 47.2%<br>[0.0, 94.7]                  | 0.226<br>[0.007, 0.651] | [-0.322, 0.799]            |
| SEEK Tactile                                                          | RBS-R RSM        | 1551            | 0.297<br>[0.217, 0.387]   | 0.001                          | 5.580                                | SIG++       | 0.003<br>[6e-14, 0.033]              | 53.0%<br>[0.0, 93.0]                  | 0.012<br>[0.000, 0.069] | [0.125, 0.485]             |
| SEEK Oral Tactile                                                     | RBS-R RSM        | 1263            | 0.269<br>[-0.122, 0.553]  | 0.109                          | 0.440                                | INC         | 0.079<br>[3e-11, 0.802]              | 70.0%<br>[0.0, 96.0]                  | 0.238<br>[0.000, 0.613] | [-0.507, 0.868]            |
| SEEK Movement                                                         | RBS-R RSM        | 1554            | 0.365<br>[0.248, 0.493]   | 0.000                          | 6.126                                | SIG++       | 0.017<br>[2e-10, 0.079]              | 73.5%<br>[26.0, 97.5]                 | 0.039<br>[0.002, 0.133] | [0.079, 0.640]             |

Table continues on following page.

ASRC SENSORY INTEGRATIVE DATA ANALYSIS – SUPPLEMENTAL INFORMATION

Supplemental Table S6 (Continued: Page 2 of 10)

| Correlations with RBS-R RSC (Higher-order Repetitive Behaviors) |           |          |                          |                          |                                  |       |                          |                                 |                         |                     |
|-----------------------------------------------------------------|-----------|----------|--------------------------|--------------------------|----------------------------------|-------|--------------------------|---------------------------------|-------------------------|---------------------|
| Sensory Construct                                               | Correlate | <i>n</i> | <i>r</i> [95% CrI]       | <i>P</i> <sub>ROPE</sub> | log( <i>BF</i> <sub>ROPE</sub> ) | Sig*  | τ <sup>2</sup> [95% CrI] | <i>I</i> <sup>2</sup> [95% CrI] | ICC [95% CrI]           | 95% PI for <i>r</i> |
| HYPER General                                                   | RBS-R RSC | 1587     | 0.358<br>[0.210, 0.484]  | 0.003                    | 4.127                            | SIG++ | 0.021<br>[1e-11, 0.128]  | 76.0%<br>[2.8, 97.8]            | 0.100<br>[0.015, 0.251] | [-0.017, 0.669]     |
| HYPER Auditory                                                  | RBS-R RSC | 1585     | 0.291<br>[0.094, 0.473]  | 0.031                    | 1.773                            | SIG+  | 0.052<br>[1e-10, 0.260]  | 81.8%<br>[22.2, 99.1]           | 0.125<br>[0.021, 0.313] | [-0.244, 0.733]     |
| HYPER Visual                                                    | RBS-R RSC | 1442     | 0.276<br>[0.142, 0.447]  | 0.010                    | 2.971                            | SIG++ | 0.013<br>[6e-10, 0.136]  | 60.4%<br>[0.0, 94.3]            | 0.077<br>[0.006, 0.265] | [-0.054, 0.620]     |
| HYPER Tactile                                                   | RBS-R RSC | 1565     | 0.321<br>[0.219, 0.433]  | < 0.001                  | 6.356                            | SIG++ | 0.005<br>[5e-11, 0.059]  | 56.0%<br>[0.0, 93.8]            | 0.073<br>[0.009, 0.210] | [0.098, 0.560]      |
| HYPER Gustatory                                                 | RBS-R RSC | 1423     | 0.271<br>[0.129, 0.457]  | 0.014                    | 2.568                            | SIG++ | 0.014<br>[2e-12, 0.187]  | 59.7%<br>[0.0, 95.3]            | 0.113<br>[0.012, 0.336] | [-0.092, 0.664]     |
| HYPER Olfactory                                                 | RBS-R RSC | 1076     | 0.164<br>[-0.587, 0.677] | 0.164                    | -0.037                           | INC   | 0.696<br>[3e-11, 16.585] | 81.0%<br>[2.6, 99.9]            | 0.851<br>[0.219, 0.996] | [-0.938, 0.997]     |
| HYPER Movement                                                  | RBS-R RSC | 1409     | 0.197<br>[0.060, 0.344]  | 0.057                    | 1.151                            | SIG+  | 0.006<br>[3e-14, 0.086]  | 52.4%<br>[0.0, 93.8]            | 0.039<br>[0.000, 0.179] | [-0.103, 0.499]     |
| HYPO Speech                                                     | RBS-R RSC | 1583     | 0.324<br>[0.165, 0.497]  | 0.006                    | 3.420                            | SIG++ | 0.054<br>[0.003, 0.211]  | 84.1%<br>[56.9, 98.3]           | 0.118<br>[0.017, 0.293] | [-0.156, 0.741]     |
| HYPO Pain/Temp                                                  | RBS-R RSC | 1268     | 0.158<br>[-0.308, 0.413] | 0.226                    | -0.431                           | INC   | 0.057<br>[5e-12, 0.846]  | 61.0%<br>[0.0, 95.9]            | 0.306<br>[0.048, 0.660] | [-0.680, 0.748]     |
| SEEK Visual                                                     | RBS-R RSC | 1282     | 0.249<br>[-0.029, 0.490] | 0.070                    | 0.933                            | INC   | 0.014<br>[2e-13, 0.379]  | 40.1%<br>[0.0, 94.8]            | 0.187<br>[0.013, 0.617] | [-0.286, 0.744]     |
| SEEK Tactile                                                    | RBS-R RSC | 1551     | 0.205<br>[0.049, 0.383]  | 0.075                    | 0.870                            | INC   | 0.029<br>[4e-11, 0.150]  | 77.3%<br>[8.9, 98.2]            | 0.053<br>[0.000, 0.190] | [-0.215, 0.607]     |
| SEEK Oral Tactile                                               | RBS-R RSC | 1263     | 0.128<br>[-0.375, 0.504] | 0.272                    | -0.672                           | INC   | 0.245<br>[4e-08, 1.481]  | 80.6%<br>[19.5, 99.3]           | 0.318<br>[0.044, 0.695] | [-0.766, 0.884]     |
| SEEK Movement                                                   | RBS-R RSC | 1554     | 0.257<br>[0.115, 0.422]  | 0.015                    | 2.516                            | SIG++ | 0.025<br>[2e-09, 0.117]  | 76.1%<br>[27.2, 97.9]           | 0.058<br>[0.007, 0.166] | [-0.103, 0.626]     |
| Correlations with RBS-R SIB (Self-injurious Behaviors)          |           |          |                          |                          |                                  |       |                          |                                 |                         |                     |
| Sensory Construct                                               | Correlate | <i>n</i> | <i>r</i> [95% CrI]       | <i>P</i> <sub>ROPE</sub> | log( <i>BF</i> <sub>ROPE</sub> ) | Sig*  | τ <sup>2</sup> [95% CrI] | <i>I</i> <sup>2</sup> [95% CrI] | ICC [95% CrI]           | 95% PI for <i>r</i> |
| HYPER General                                                   | RBS-R SIB | 1586     | 0.229<br>[0.138, 0.330]  | 0.006                    | 3.499                            | SIG++ | 0.003<br>[2e-11, 0.038]  | 50.3%<br>[0.0, 93.3]            | 0.087<br>[0.017, 0.222] | [0.032, 0.434]      |
| HYPER Auditory                                                  | RBS-R SIB | 1584     | 0.167<br>[0.054, 0.274]  | 0.100                    | 0.520                            | INC   | 0.004<br>[7e-13, 0.049]  | 55.2%<br>[0.0, 94.0]            | 0.117<br>[0.015, 0.311] | [-0.080, 0.401]     |
| HYPER Visual                                                    | RBS-R SIB | 1441     | 0.155<br>[0.038, 0.317]  | 0.131                    | 0.216                            | INC   | 0.006<br>[1e-13, 0.103]  | 51.8%<br>[0.0, 94.9]            | 0.080<br>[0.008, 0.256] | [-0.129, 0.495]     |
| HYPER Tactile                                                   | RBS-R SIB | 1564     | 0.247<br>[0.145, 0.363]  | 0.004                    | 3.747                            | SIG++ | 0.004<br>[7e-16, 0.040]  | 49.6%<br>[0.0, 91.5]            | 0.085<br>[0.012, 0.232] | [0.048, 0.476]      |
| HYPER Gustatory                                                 | RBS-R SIB | 1422     | 0.140<br>[-0.054, 0.375] | 0.317                    | -0.905                           | INC   | 0.028<br>[8e-12, 0.279]  | 68.5%<br>[4.4, 98.6]            | 0.163<br>[0.024, 0.412] | [-0.336, 0.661]     |
| HYPER Olfactory                                                 | RBS-R SIB | 1076     | 0.096<br>[-0.614, 0.642] | 0.208                    | -0.327                           | INC   | 0.626<br>[7e-11, 15.518] | 80.4%<br>[2.5, 99.9]            | 0.837<br>[0.201, 0.996] | [-0.937, 0.995]     |
| HYPER Movement                                                  | RBS-R SIB | 1408     | 0.137<br>[-0.008, 0.312] | 0.254                    | -0.595                           | INC   | 0.009<br>[3e-15, 0.114]  | 57.9%<br>[0.0, 94.4]            | 0.054<br>[0.002, 0.215] | [-0.203, 0.496]     |
| HYPO Speech                                                     | RBS-R SIB | 1582     | 0.257<br>[0.117, 0.405]  | 0.014                    | 2.616                            | SIG++ | 0.028<br>[4e-07, 0.114]  | 80.1%<br>[48.6, 98.2]           | 0.086<br>[0.012, 0.230] | [-0.120, 0.615]     |
| HYPO Pain/Temp                                                  | RBS-R SIB | 1267     | 0.187<br>[-0.039, 0.384] | 0.114                    | 0.390                            | INC   | 0.009<br>[4e-11, 0.196]  | 42.9%<br>[0.0, 94.4]            | 0.274<br>[0.027, 0.628] | [-0.247, 0.588]     |
| SEEK Visual                                                     | RBS-R SIB | 1281     | 0.184<br>[-0.088, 0.394] | 0.159                    | 0.010                            | INC   | 0.011<br>[2e-12, 0.280]  | 42.9%<br>[0.0, 94.9]            | 0.196<br>[0.016, 0.584] | [-0.337, 0.623]     |
| SEEK Tactile                                                    | RBS-R SIB | 1550     | 0.191<br>[0.089, 0.327]  | 0.031                    | 1.786                            | SIG+  | 0.005<br>[3e-13, 0.046]  | 54.7%<br>[0.0, 91.5]            | 0.028<br>[0.000, 0.110] | [-0.025, 0.454]     |
| SEEK Oral Tactile                                               | RBS-R SIB | 1262     | 0.203<br>[-0.079, 0.409] | 0.133                    | 0.222                            | INC   | 0.014<br>[2e-13, 0.284]  | 47.5%<br>[0.0, 94.8]            | 0.224<br>[0.004, 0.621] | [-0.318, 0.649]     |
| SEEK Movement                                                   | RBS-R SIB | 1553     | 0.181<br>[0.073, 0.328]  | 0.057                    | 1.152                            | SIG+  | 0.006<br>[8e-13, 0.046]  | 52.7%<br>[0.0, 90.1]            | 0.043<br>[0.005, 0.137] | [-0.036, 0.449]     |

Table continues on following page.

ASRC SENSORY INTEGRATIVE DATA ANALYSIS – SUPPLEMENTAL INFORMATION

Supplemental Table S6 (Continued: Page 3 of 10)

| Correlations with Internalizing Symptoms |                 |            |                                |                          |                                  |              |                                |                                 |                                |                        |
|------------------------------------------|-----------------|------------|--------------------------------|--------------------------|----------------------------------|--------------|--------------------------------|---------------------------------|--------------------------------|------------------------|
| Sensory Construct                        | Correlate       | <i>n</i>   | <i>r</i> [95% CrI]             | <i>P</i> <sub>ROPE</sub> | log( <i>BF</i> <sub>ROPE</sub> ) | Sig*         | τ <sup>2</sup> [95% CrI]       | <i>I</i> <sup>2</sup> [95% CrI] | ICC [95% CrI]                  | 95% PI for <i>r</i>    |
| <b>HYPER General</b>                     | <b>PSYC INT</b> | <b>765</b> | <b>0.218</b><br>[0.082, 0.347] | <b>0.047</b>             | <b>1.352</b>                     | <b>SIG+</b>  | <b>0.030</b><br>[2e-10, 0.110] | <b>85.2%</b><br>[43.6, 98.5]    | <b>0.140</b><br>[0.041, 0.292] | <b>[-0.181, 0.575]</b> |
| HYPER Auditory                           | PSYC INT        | 763        | 0.194<br>[0.069, 0.303]        | 0.067                    | 0.985                            | INC          | 0.011<br>[4e-12, 0.069]        | 75.0%<br>[3.2, 97.4]            | 0.037<br>[0.000, 0.121]        | [-0.119, 0.475]        |
| HYPER Visual                             | PSYC INT        | 623        | 0.190<br>[0.059, 0.303]        | 0.078                    | 0.808                            | INC          | 0.015<br>[2e-13, 0.077]        | 78.5%<br>[8.2, 98.2]            | 0.242<br>[0.084, 0.477]        | [-0.141, 0.494]        |
| HYPER Tactile                            | PSYC INT        | 765        | 0.171<br>[0.016, 0.314]        | 0.170                    | -0.080                           | INC          | 0.038<br>[1e-12, 0.134]        | 85.9%<br>[42.3, 98.4]           | 0.168<br>[0.064, 0.318]        | [-0.283, 0.566]        |
| <b>HYPER Gustatory</b>                   | <b>PSYC INT</b> | <b>625</b> | <b>0.178</b><br>[0.086, 0.266] | <b>0.045</b>             | <b>1.396</b>                     | <b>SIG+</b>  | <b>0.003</b><br>[1e-12, 0.029] | <b>52.3%</b><br>[0.0, 92.5]     | <b>0.071</b><br>[0.005, 0.203] | <b>[-0.009, 0.364]</b> |
| HYPER Movement                           | PSYC INT        | 543        | 0.159<br>[0.020, 0.301]        | 0.177                    | -0.115                           | INC          | 0.017<br>[3e-11, 0.099]        | 74.9%<br>[5.3, 98.2]            | 0.089<br>[0.006, 0.271]        | [-0.202, 0.495]        |
| <b>HYPO Speech</b>                       | <b>PSYC INT</b> | <b>761</b> | <b>0.286</b><br>[0.125, 0.453] | <b>0.015</b>             | <b>2.504</b>                     | <b>SIG++</b> | <b>0.080</b><br>[0.007, 0.232] | <b>89.6%</b><br>[72.4, 98.2]    | <b>0.148</b><br>[0.054, 0.285] | <b>[-0.257, 0.743]</b> |
| HYPO Pain/Temp                           | PSYC INT        | 589        | 0.091<br>[-0.066, 0.244]       | 0.541                    | -1.828                           | ZERO+        | 0.022<br>[5e-13, 0.120]        | 78.1%<br>[8.9, 98.7]            | 0.308<br>[0.123, 0.572]        | [-0.308, 0.479]        |
| SEEK Visual                              | PSYC INT        | 592        | 0.100<br>[-0.057, 0.240]       | 0.484                    | -1.607                           | ZERO+        | 0.015<br>[6e-12, 0.103]        | 71.9%<br>[0.0, 94.7]            | 0.087<br>[0.001, 0.262]        | [-0.280, 0.442]        |
| SEEK Tactile                             | PSYC INT        | 755        | 0.129<br>[0.010, 0.263]        | 0.305                    | -0.837                           | INC          | 0.013<br>[1e-11, 0.080]        | 75.1%<br>[3.4, 97.7]            | 0.080<br>[0.014, 0.194]        | [-0.180, 0.461]        |
| SEEK Oral Tactile                        | PSYC INT        | 532        | 0.105<br>[-0.093, 0.292]       | 0.451                    | -1.463                           | ZERO+        | 0.042<br>[2e-12, 0.178]        | 80.8%<br>[36.3, 99.0]           | 0.130<br>[0.026, 0.347]        | [-0.391, 0.558]        |
| SEEK Movement                            | PSYC INT        | 761        | 0.134<br>[0.032, 0.235]        | 0.245                    | -0.519                           | INC          | 0.007<br>[2e-13, 0.046]        | 71.7%<br>[0.0, 94.3]            | 0.084<br>[0.022, 0.190]        | [-0.115, 0.386]        |
| Correlations with Externalizing Symptoms |                 |            |                                |                          |                                  |              |                                |                                 |                                |                        |
| Sensory Construct                        | Correlate       | <i>n</i>   | <i>r</i> [95% CrI]             | <i>P</i> <sub>ROPE</sub> | log( <i>BF</i> <sub>ROPE</sub> ) | Sig*         | τ <sup>2</sup> [95% CrI]       | <i>I</i> <sup>2</sup> [95% CrI] | ICC [95% CrI]                  | 95% PI for <i>r</i>    |
| <b>HYPER General</b>                     | <b>PSYC EXT</b> | <b>766</b> | <b>0.224</b><br>[0.099, 0.333] | <b>0.032</b>             | <b>1.727</b>                     | <b>SIG+</b>  | <b>0.009</b><br>[8e-15, 0.052] | <b>67.7%</b><br>[0.0, 92.4]     | <b>0.114</b><br>[0.030, 0.250] | <b>[-0.046, 0.480]</b> |
| <b>HYPER Auditory</b>                    | <b>PSYC EXT</b> | <b>764</b> | <b>0.190</b><br>[0.090, 0.289] | <b>0.040</b>             | <b>1.523</b>                     | <b>SIG+</b>  | <b>0.005</b><br>[1e-11, 0.043] | <b>64.8%</b><br>[0.0, 93.8]     | <b>0.028</b><br>[0.000, 0.106] | <b>[-0.046, 0.421]</b> |
| HYPER Visual                             | PSYC EXT        | 622        | 0.178<br>[0.055, 0.299]        | 0.096                    | 0.558                            | INC          | 0.014<br>[3e-11, 0.066]        | 76.8%<br>[10.0, 98.0]           | 0.242<br>[0.087, 0.478]        | [-0.126, 0.477]        |
| <b>HYPER Tactile</b>                     | <b>PSYC EXT</b> | <b>766</b> | <b>0.209</b><br>[0.088, 0.337] | <b>0.036</b>             | <b>1.624</b>                     | <b>SIG+</b>  | <b>0.021</b><br>[4e-11, 0.089] | <b>82.0%</b><br>[11.2, 98.4]    | <b>0.144</b><br>[0.046, 0.291] | <b>[-0.132, 0.544]</b> |
| <b>HYPER Gustatory</b>                   | <b>PSYC EXT</b> | <b>624</b> | <b>0.179</b><br>[0.073, 0.296] | <b>0.058</b>             | <b>1.121</b>                     | <b>SIG+</b>  | <b>0.007</b><br>[2e-11, 0.056] | <b>66.9%</b><br>[0.0, 94.1]     | <b>0.079</b><br>[0.008, 0.214] | <b>[-0.073, 0.451]</b> |
| HYPER Movement                           | PSYC EXT        | 543        | 0.081<br>[-0.075, 0.224]       | 0.599                    | -2.073                           | ZERO+        | 0.016<br>[3e-11, 0.100]        | 73.7%<br>[3.9, 97.9]            | 0.088<br>[0.007, 0.254]        | [-0.290, 0.430]        |
| <b>HYPO Speech</b>                       | <b>PSYC EXT</b> | <b>762</b> | <b>0.276</b><br>[0.144, 0.411] | <b>0.008</b>             | <b>3.200</b>                     | <b>SIG++</b> | <b>0.041</b><br>[1e-07, 0.130] | <b>87.5%</b><br>[58.6, 98.3]    | <b>0.114</b><br>[0.036, 0.229] | <b>[-0.152, 0.642]</b> |
| HYPO Pain/Temp                           | PSYC EXT        | 588        | 0.121<br>[-0.030, 0.284]       | 0.379                    | -1.176                           | ZERO+        | 0.024<br>[7e-13, 0.114]        | 78.5%<br>[25.1, 98.7]           | 0.300<br>[0.116, 0.558]        | [-0.271, 0.507]        |
| SEEK Visual                              | PSYC EXT        | 591        | 0.079<br>[-0.058, 0.213]       | 0.622                    | -2.166                           | ZERO+        | 0.008<br>[1e-12, 0.067]        | 63.1%<br>[0.0, 93.3]            | 0.078<br>[0.000, 0.240]        | [-0.232, 0.369]        |
| <b>SEEK Tactile</b>                      | <b>PSYC EXT</b> | <b>756</b> | <b>0.206</b><br>[0.073, 0.344] | <b>0.050</b>             | <b>1.291</b>                     | <b>SIG+</b>  | <b>0.029</b><br>[8e-16, 0.121] | <b>84.4%</b><br>[25.4, 99.0]    | <b>0.093</b><br>[0.017, 0.218] | <b>[-0.184, 0.584]</b> |
| SEEK Oral Tactile                        | PSYC EXT        | 532        | 0.138<br>[-0.053, 0.317]       | 0.315                    | -0.882                           | INC          | 0.037<br>[5e-10, 0.168]        | 80.1%<br>[31.8, 98.7]           | 0.138<br>[0.029, 0.356]        | [-0.340, 0.570]        |
| <b>SEEK Movement</b>                     | <b>PSYC EXT</b> | <b>762</b> | <b>0.242</b><br>[0.119, 0.368] | <b>0.013</b>             | <b>2.644</b>                     | <b>SIG++</b> | <b>0.025</b><br>[2e-10, 0.099] | <b>83.6%</b><br>[17.7, 98.6]    | <b>0.113</b><br>[0.032, 0.234] | <b>[-0.117, 0.583]</b> |

Table continues on following page.

ASRC SENSORY INTEGRATIVE DATA ANALYSIS – SUPPLEMENTAL INFORMATION

Supplemental Table S6 (Continued: Page 4 of 10)

| Correlations with ADHD Features              |                   |            |                                       |                          |                                  |              |                                       |                                     |                                       |                        |
|----------------------------------------------|-------------------|------------|---------------------------------------|--------------------------|----------------------------------|--------------|---------------------------------------|-------------------------------------|---------------------------------------|------------------------|
| Sensory Construct                            | Correlate         | <i>n</i>   | <i>r</i> [95% CrI]                    | <i>P</i> <sub>ROPE</sub> | log( <i>BF</i> <sub>ROPE</sub> ) | Sig*         | τ <sup>2</sup> [95% CrI]              | <i>I</i> <sup>2</sup> [95% CrI]     | ICC [95% CrI]                         | 95% PI for <i>r</i>    |
| HYPER General                                | PSYC ADHD         | 717        | 0.177<br>[0.072, 0.273]               | 0.071                    | 0.892                            | INC          | 0.006<br>[1e-13, 0.041]               | 68.3%<br>[0.0, 93.5]                | 0.131<br>[0.036, 0.291]               | [-0.065, 0.403]        |
| HYPER Auditory                               | PSYC ADHD         | 715        | 0.179<br>[0.061, 0.275]               | 0.086                    | 0.718                            | INC          | 0.004<br>[3e-12, 0.039]               | 58.2%<br>[0.0, 92.4]                | 0.078<br>[0.002, 0.224]               | [-0.059, 0.392]        |
| HYPER Visual                                 | PSYC ADHD         | 574        | 0.133<br>[0.031, 0.231]               | 0.250                    | -0.555                           | INC          | 0.003<br>[4e-11, 0.027]               | 47.6%<br>[0.0, 90.7]                | 0.195<br>[0.064, 0.405]               | [-0.060, 0.321]        |
| HYPER Tactile                                | PSYC ADHD         | 717        | 0.152<br>[0.050, 0.247]               | 0.146                    | 0.106                            | INC          | 0.005<br>[6e-14, 0.036]               | 64.9%<br>[0.0, 93.0]                | 0.151<br>[0.046, 0.317]               | [-0.073, 0.370]        |
| HYPER Gustatory                              | PSYC ADHD         | 576        | 0.127<br>[0.030, 0.229]               | 0.283                    | -0.748                           | INC          | 0.003<br>[6e-13, 0.028]               | 51.1%<br>[0.0, 91.2]                | 0.069<br>[0.000, 0.209]               | [-0.070, 0.320]        |
| HYPER Movement                               | PSYC ADHD         | 494        | 0.110<br>[-0.009, 0.222]              | 0.428                    | -1.360                           | ZERO+        | 0.003<br>[3e-14, 0.037]               | 47.7%<br>[0.0, 91.1]                | 0.049<br>[0.000, 0.168]               | [-0.120, 0.325]        |
| <b>HYPO Speech</b>                           | <b>PSYC ADHD</b>  | <b>713</b> | <b>0.297</b><br><b>[0.135, 0.449]</b> | <b>0.013</b>             | <b>2.696</b>                     | <b>SIG++</b> | <b>0.069</b><br><b>[0.009, 0.193]</b> | <b>89.1%</b><br><b>[73.5, 97.9]</b> | <b>0.192</b><br><b>[0.080, 0.343]</b> | <b>[-0.226, 0.719]</b> |
| HYPO Pain/Temp                               | PSYC ADHD         | 496        | 0.073<br>[-0.106, 0.252]              | 0.605                    | -2.097                           | ZERO+        | 0.033<br>[2e-12, 0.159]               | 80.1%<br>[26.1, 99.0]               | 0.341<br>[0.140, 0.600]               | [-0.378, 0.519]        |
| SEEK Visual                                  | PSYC ADHD         | 499        | 0.124<br>[-0.072, 0.306]              | 0.384                    | -1.191                           | ZERO+        | 0.033<br>[6e-11, 0.141]               | 76.8%<br>[25.3, 98.3]               | 0.110<br>[0.015, 0.286]               | [-0.326, 0.543]        |
| <b>SEEK Tactile</b>                          | <b>PSYC ADHD</b>  | <b>706</b> | <b>0.218</b><br><b>[0.077, 0.360]</b> | <b>0.043</b>             | <b>1.409</b>                     | <b>SIG+</b>  | <b>0.031</b><br><b>[5e-10, 0.133]</b> | <b>83.7%</b><br><b>[20.1, 98.9]</b> | <b>0.108</b><br><b>[0.014, 0.248]</b> | <b>[-0.197, 0.599]</b> |
| SEEK Oral Tactile                            | PSYC ADHD         | 440        | 0.285<br>[0.156, 0.402]               | 0.009                    | 3.110                            | SIG++        | 0.007<br>[2e-13, 0.081]               | 58.5%<br>[0.0, 94.1]                | 0.161<br>[0.020, 0.428]               | [-0.005, 0.552]        |
| SEEK Movement                                | PSYC ADHD         | 713        | 0.229<br>[0.078, 0.370]               | 0.044                    | 1.416                            | SIG+         | 0.043<br>[3e-09, 0.138]               | 86.9%<br>[61.1, 98.3]               | 0.108<br>[0.027, 0.238]               | [-0.212, 0.631]        |
| Correlations with Total Psychiatric Symptoms |                   |            |                                       |                          |                                  |              |                                       |                                     |                                       |                        |
| Sensory Construct                            | Correlate         | <i>n</i>   | <i>r</i> [95% CrI]                    | <i>P</i> <sub>ROPE</sub> | log( <i>BF</i> <sub>ROPE</sub> ) | Sig*         | τ <sup>2</sup> [95% CrI]              | <i>I</i> <sup>2</sup> [95% CrI]     | ICC [95% CrI]                         | 95% PI for <i>r</i>    |
| <b>HYPER General</b>                         | <b>PSYC Total</b> | <b>671</b> | <b>0.245</b><br><b>[0.097, 0.371]</b> | <b>0.033</b>             | <b>1.708</b>                     | <b>SIG+</b>  | <b>0.028</b><br><b>[1e-10, 0.101]</b> | <b>82.7%</b><br><b>[31.3, 98.2]</b> | <b>0.153</b><br><b>[0.042, 0.336]</b> | <b>[-0.147, 0.584]</b> |
| <b>HYPER Auditory</b>                        | <b>PSYC Total</b> | <b>670</b> | <b>0.233</b><br><b>[0.099, 0.357]</b> | <b>0.030</b>             | <b>1.792</b>                     | <b>SIG+</b>  | <b>0.019</b><br><b>[6e-14, 0.106]</b> | <b>79.3%</b><br><b>[4.3, 98.2]</b>  | <b>0.075</b><br><b>[0.000, 0.208]</b> | <b>[-0.141, 0.561]</b> |
| HYPER Visual                                 | PSYC Total        | 621        | 0.189<br>[0.046, 0.312]               | 0.096                    | 0.597                            | INC          | 0.016<br>[8e-12, 0.090]               | 76.3%<br>[6.1, 98.1]                | 0.240<br>[0.085, 0.465]               | [-0.160, 0.509]        |
| HYPER Tactile                                | PSYC Total        | 671        | 0.196<br>[0.042, 0.336]               | 0.098                    | 0.575                            | INC          | 0.040<br>[1e-10, 0.131]               | 86.6%<br>[51.2, 98.3]               | 0.185<br>[0.064, 0.358]               | [-0.253, 0.593]        |
| <b>HYPER Gustatory</b>                       | <b>PSYC Total</b> | <b>622</b> | <b>0.203</b><br><b>[0.093, 0.327]</b> | <b>0.031</b>             | <b>1.770</b>                     | <b>SIG+</b>  | <b>0.010</b><br><b>[4e-13, 0.065]</b> | <b>71.7%</b><br><b>[0.0, 94.0]</b>  | <b>0.118</b><br><b>[0.019, 0.296]</b> | <b>[-0.074, 0.494]</b> |
| HYPER Movement                               | PSYC Total        | 543        | 0.178<br>[0.050, 0.303]               | 0.101                    | 0.529                            | INC          | 0.009<br>[3e-12, 0.069]               | 67.4%<br>[0.0, 93.9]                | 0.069<br>[0.004, 0.214]               | [-0.119, 0.464]        |
| <b>HYPO Speech</b>                           | <b>PSYC Total</b> | <b>669</b> | <b>0.329</b><br><b>[0.197, 0.460]</b> | <b>0.003</b>             | <b>4.240</b>                     | <b>SIG++</b> | <b>0.039</b><br><b>[3e-10, 0.146]</b> | <b>86.1%</b><br><b>[20.9, 98.8]</b> | <b>0.122</b><br><b>[0.029, 0.259]</b> | <b>[-0.083, 0.697]</b> |
| HYPO Pain/Temp                               | PSYC Total        | 587        | 0.156<br>[-0.019, 0.325]              | 0.211                    | -0.353                           | INC          | 0.027<br>[5e-13, 0.186]               | 77.8%<br>[5.5, 98.8]                | 0.337<br>[0.138, 0.594]               | [-0.307, 0.585]        |
| SEEK Visual                                  | PSYC Total        | 590        | 0.133<br>[-0.032, 0.274]              | 0.316                    | -0.892                           | INC          | 0.015<br>[1e-14, 0.105]               | 70.8%<br>[0.0, 94.3]                | 0.085<br>[0.000, 0.247]               | [-0.262, 0.467]        |
| SEEK Tactile                                 | PSYC Total        | 665        | 0.194<br>[0.052, 0.332]               | 0.081                    | 0.761                            | INC          | 0.025<br>[1e-10, 0.119]               | 81.9%<br>[13.6, 98.8]               | 0.092<br>[0.016, 0.225]               | [-0.203, 0.560]        |
| <b>SEEK Oral Tactile</b>                     | <b>PSYC Total</b> | <b>532</b> | <b>0.259</b><br><b>[0.140, 0.371]</b> | <b>0.013</b>             | <b>2.717</b>                     | <b>SIG++</b> | <b>0.004</b><br><b>[2e-14, 0.055]</b> | <b>46.7%</b><br><b>[0.0, 92.8]</b>  | <b>0.188</b><br><b>[0.029, 0.473]</b> | <b>[0.004, 0.477]</b>  |
| <b>SEEK Movement</b>                         | <b>PSYC Total</b> | <b>667</b> | <b>0.251</b><br><b>[0.119, 0.379]</b> | <b>0.018</b>             | <b>2.331</b>                     | <b>SIG++</b> | <b>0.025</b><br><b>[9e-13, 0.106]</b> | <b>83.0%</b><br><b>[14.5, 98.6]</b> | <b>0.136</b><br><b>[0.037, 0.292]</b> | <b>[-0.130, 0.589]</b> |

Table continues on following page.

ASRC SENSORY INTEGRATIVE DATA ANALYSIS – SUPPLEMENTAL INFORMATION

Supplemental Table S6 (Continued: Page 5 of 10)

| Correlations with Chronological Age                  |           |          |                                          |                          |                                  |             |                                       |                                     |                                       |                        |
|------------------------------------------------------|-----------|----------|------------------------------------------|--------------------------|----------------------------------|-------------|---------------------------------------|-------------------------------------|---------------------------------------|------------------------|
| Sensory Construct                                    | Correlate | <i>n</i> | <i>r</i> [95% CrI]                       | <i>P</i> <sub>ROPE</sub> | log( <i>BF</i> <sub>ROPE</sub> ) | Sig*        | τ <sup>2</sup> [95% CrI]              | <i>I</i> <sup>2</sup> [95% CrI]     | ICC [95% CrI]                         | 95% PI for <i>r</i>    |
| HYPER General                                        | Age       | 3866     | 0.009<br>[-0.061, 0.072]                 | 0.994                    | -6.830                           | ZERO++      | 0.006<br>[2e-09, 0.021]               | 83.8%<br>[48.4, 98.1]               | 0.082<br>[0.036, 0.152]               | [-0.185, 0.196]        |
| HYPER Auditory                                       | Age       | 3860     | -0.037<br>[-0.127, 0.049]                | 0.925                    | -4.165                           | ZERO++      | 0.017<br>[2e-10, 0.059]               | 89.5%<br>[62.3, 98.8]               | 0.059<br>[0.016, 0.134]               | [-0.343, 0.263]        |
| HYPER Visual                                         | Age       | 3700     | 0.013<br>[-0.034, 0.059]                 | 0.999                    | -9.277                           | ZERO++      | 4e-04<br>[3e-15, 0.005]               | 44.1%<br>[0.0, 90.4]                | 0.092<br>[0.039, 0.170]               | [-0.078, 0.097]        |
| HYPER Tactile                                        | Age       | 3837     | 0.014<br>[-0.057, 0.073]                 | 0.995                    | -6.995                           | ZERO++      | 0.004<br>[2e-11, 0.019]               | 76.5%<br>[6.2, 97.7]                | 0.092<br>[0.038, 0.170]               | [-0.169, 0.173]        |
| HYPER Gustatory                                      | Age       | 3682     | -0.065<br>[-0.123, -0.008]               | 0.894                    | -3.806                           | ZERO++      | 0.002<br>[2e-12, 0.014]               | 73.9%<br>[3.8, 97.3]                | 0.044<br>[0.013, 0.097]               | [-0.211, 0.080]        |
| HYPER Olfactory                                      | Age       | 2467     | 0.205<br>[-0.128, 0.498]                 | 0.165                    | -0.047                           | INC         | 0.050<br>[4e-04, 0.567]               | 64.1%<br>[20.6, 99.5]               | 0.214<br>[0.016, 0.671]               | [-0.453, 0.785]        |
| HYPER Movement                                       | Age       | 3524     | 0.038<br>[-0.036, 0.110]                 | 0.960                    | -4.833                           | ZERO++      | 0.006<br>[4e-11, 0.024]               | 81.9%<br>[32.9, 98.4]               | 0.036<br>[0.010, 0.079]               | [-0.160, 0.238]        |
| HYPO Speech                                          | Age       | 3855     | -0.129<br>[-0.189, -0.076]               | 0.141                    | 0.151                            | INC         | 0.003<br>[4e-12, 0.014]               | 76.5%<br>[12.4, 97.9]               | 0.058<br>[0.024, 0.109]               | [-0.278, 0.013]        |
| HYPO Pain/Temp                                       | Age       | 3484     | -0.020<br>[-0.133, 0.078]                | 0.915                    | -4.036                           | ZERO++      | 0.018<br>[0.002, 0.056]               | 86.4%<br>[68.6, 97.7]               | 0.157<br>[0.066, 0.286]               | [-0.333, 0.286]        |
| SEEK Visual                                          | Age       | 3502     | -0.114<br>[-0.205, -0.011]               | 0.385                    | -1.201                           | ZERO+       | 0.014<br>[0.001, 0.046]               | 84.9%<br>[62.9, 97.4]               | 0.062<br>[0.020, 0.134]               | [-0.382, 0.172]        |
| SEEK Tactile                                         | Age       | 3816     | -0.123<br>[-0.188, -0.060]               | 0.221                    | -0.406                           | INC         | 0.004<br>[6e-11, 0.018]               | 78.5%<br>[15.0, 98.0]               | 0.035<br>[0.008, 0.075]               | [-0.291, 0.042]        |
| SEEK Oral Tactile                                    | Age       | 3367     | <b>-0.164</b><br><b>[-0.248, -0.091]</b> | <b>0.034</b>             | <b>1.677</b>                     | <b>SIG+</b> | <b>0.006</b><br><b>[6e-11, 0.025]</b> | <b>77.0%</b><br><b>[19.0, 97.9]</b> | <b>0.035</b><br><b>[0.006, 0.087]</b> | <b>[-0.373, 0.017]</b> |
| SEEK Movement                                        | Age       | 3824     | <b>-0.187</b><br><b>[-0.274, -0.100]</b> | <b>0.026</b>             | <b>1.963</b>                     | <b>SIG+</b> | <b>0.022</b><br><b>[0.005, 0.056]</b> | <b>91.1%</b><br><b>[80.2, 97.9]</b> | <b>0.079</b><br><b>[0.035, 0.147]</b> | <b>[-0.479, 0.129]</b> |
| Correlations with Verbal Cognitive Scores (IQ or DQ) |           |          |                                          |                          |                                  |             |                                       |                                     |                                       |                        |
| Sensory Construct                                    | Correlate | <i>n</i> | <i>r</i> [95% CrI]                       | <i>P</i> <sub>ROPE</sub> | log( <i>BF</i> <sub>ROPE</sub> ) | Sig*        | τ <sup>2</sup> [95% CrI]              | <i>I</i> <sup>2</sup> [95% CrI]     | ICC [95% CrI]                         | 95% PI for <i>r</i>    |
| HYPER General                                        | VIQ/DQ    | 1038     | 0.036<br>[-0.056, 0.120]                 | 0.931                    | -4.269                           | ZERO++      | 0.005<br>[5e-13, 0.036]               | 70.9%<br>[0.0, 94.8]                | 0.049<br>[0.005, 0.117]               | [-0.197, 0.255]        |
| HYPER Auditory                                       | VIQ/DQ    | 1037     | 0.073<br>[-0.025, 0.162]                 | 0.729                    | -2.674                           | ZERO++      | 0.004<br>[4e-13, 0.032]               | 65.8%<br>[0.0, 93.3]                | 0.033<br>[0.000, 0.095]               | [-0.146, 0.281]        |
| HYPER Visual                                         | VIQ/DQ    | 907      | 0.085<br>[-0.014, 0.174]                 | 0.632                    | -2.197                           | ZERO+       | 0.003<br>[6e-14, 0.030]               | 51.8%<br>[0.0, 92.8]                | 0.077<br>[0.020, 0.170]               | [-0.126, 0.271]        |
| HYPER Tactile                                        | VIQ/DQ    | 1035     | 0.019<br>[-0.064, 0.104]                 | 0.965                    | -4.961                           | ZERO++      | 0.003<br>[1e-12, 0.030]               | 64.9%<br>[0.0, 94.2]                | 0.033<br>[0.000, 0.096]               | [-0.182, 0.224]        |
| HYPER Gustatory                                      | VIQ/DQ    | 905      | 0.002<br>[-0.099, 0.114]                 | 0.934                    | -4.287                           | ZERO++      | 0.006<br>[2e-12, 0.050]               | 68.3%<br>[0.0, 94.4]                | 0.044<br>[0.002, 0.120]               | [-0.242, 0.282]        |
| HYPER Olfactory                                      | VIQ/DQ    | 100      | 0.004<br>[-0.414, 0.408]                 | 0.423                    | -1.333                           | ZERO+       | 0.053<br>[9e-14, 1.090]               | 52.6%<br>[0.0, 95.8]                | 0.384<br>[0.020, 0.854]               | [-0.760, 0.731]        |
| HYPER Movement                                       | VIQ/DQ    | 853      | 0.033<br>[-0.068, 0.133]                 | 0.902                    | -3.893                           | ZERO++      | 0.003<br>[5e-15, 0.032]               | 53.8%<br>[0.0, 92.4]                | 0.045<br>[0.002, 0.123]               | [-0.180, 0.239]        |
| HYPO Speech                                          | VIQ/DQ    | 1037     | 0.055<br>[-0.046, 0.166]                 | 0.803                    | -3.067                           | ZERO++      | 0.014<br>[5e-13, 0.071]               | 83.1%<br>[7.0, 98.5]                | 0.078<br>[0.025, 0.160]               | [-0.250, 0.387]        |
| HYPO Pain/Temp                                       | VIQ/DQ    | 803      | -0.101<br>[-0.236, 0.031]                | 0.492                    | -1.626                           | ZERO+       | 0.026<br>[0.002, 0.080]               | 84.4%<br>[62.3, 97.1]               | 0.140<br>[0.055, 0.269]               | [-0.461, 0.258]        |
| SEEK Visual                                          | VIQ/DQ    | 803      | -0.096<br>[-0.211, 0.020]                | 0.525                    | -1.776                           | ZERO+       | 0.008<br>[8e-13, 0.048]               | 68.6%<br>[0.0, 93.1]                | 0.021<br>[0.000, 0.086]               | [-0.356, 0.170]        |
| SEEK Tactile                                         | VIQ/DQ    | 1016     | -0.089<br>[-0.185, 0.007]                | 0.595                    | -2.038                           | ZERO+       | 0.007<br>[3e-11, 0.041]               | 74.6%<br>[0.0, 94.4]                | 0.042<br>[0.003, 0.102]               | [-0.332, 0.154]        |
| SEEK Oral Tactile                                    | VIQ/DQ    | 760      | <b>-0.132</b><br><b>[-0.248, -0.008]</b> | 0.291                    | -0.768                           | INC         | 0.008<br>[3e-12, 0.054]               | 67.0%<br>[0.0, 93.3]                | 0.058<br>[0.007, 0.157]               | [-0.391, 0.150]        |
| SEEK Movement                                        | VIQ/DQ    | 1033     | -0.043<br>[-0.144, 0.060]                | 0.868                    | -3.525                           | ZERO++      | 0.011<br>[4e-12, 0.047]               | 79.6%<br>[12.6, 97.9]               | 0.070<br>[0.023, 0.143]               | [-0.306, 0.233]        |

Table continues on following page.



ASRC SENSORY INTEGRATIVE DATA ANALYSIS – SUPPLEMENTAL INFORMATION

Supplemental Table S6 (Continued: Page 6 of 10)

| Correlations with Verbal Cognitive Scores (IQ Only)     |           |          |                            |                          |                                  |        |                          |                                 |                         |                     |
|---------------------------------------------------------|-----------|----------|----------------------------|--------------------------|----------------------------------|--------|--------------------------|---------------------------------|-------------------------|---------------------|
| Sensory Construct                                       | Correlate | <i>n</i> | <i>r</i> [95% CrI]         | <i>P</i> <sub>ROPE</sub> | log( <i>BF</i> <sub>ROPE</sub> ) | Sig*   | τ <sup>2</sup> [95% CrI] | <i>I</i> <sup>2</sup> [95% CrI] | ICC [95% CrI]           | 95% PI for <i>r</i> |
| HYPER General                                           | VIQ       | 808      | 0.032<br>[-0.061, 0.122]   | 0.928                    | -4.215                           | ZERO++ | 0.002<br>[3e-13, 0.025]  | 52.9%<br>[0.0, 91.9]            | 0.029<br>[0.000, 0.095] | [-0.157, 0.218]     |
| HYPER Auditory                                          | VIQ       | 808      | -0.015<br>[-0.108, 0.076]  | 0.955                    | -4.704                           | ZERO++ | 0.003<br>[3e-14, 0.030]  | 60.3%<br>[0.0, 93.0]            | 0.028<br>[0.000, 0.094] | [-0.222, 0.184]     |
| HYPER Visual                                            | VIQ       | 737      | 0.054<br>[-0.052, 0.156]   | 0.823                    | -3.206                           | ZERO++ | 0.005<br>[5e-14, 0.047]  | 66.0%<br>[0.0, 94.3]            | 0.074<br>[0.013, 0.178] | [-0.202, 0.298]     |
| HYPER Tactile                                           | VIQ       | 805      | 0.045<br>[-0.045, 0.134]   | 0.887                    | -3.716                           | ZERO++ | 0.003<br>[3e-15, 0.028]  | 58.2%<br>[0.0, 92.9]            | 0.023<br>[0.000, 0.087] | [-0.145, 0.246]     |
| HYPER Gustatory                                         | VIQ       | 735      | -0.005<br>[-0.116, 0.112]  | 0.917                    | -4.076                           | ZERO++ | 0.009<br>[9e-14, 0.063]  | 73.1%<br>[0.0, 94.9]            | 0.041<br>[0.000, 0.121] | [-0.293, 0.291]     |
| HYPER Olfactory                                         | VIQ       | 683      | 0.017<br>[-0.109, 0.133]   | 0.889                    | -3.744                           | ZERO++ | 0.008<br>[5e-12, 0.050]  | 67.9%<br>[0.0, 92.9]            | 0.031<br>[0.000, 0.106] | [-0.262, 0.282]     |
| HYPER Movement                                          | VIQ       | 808      | 0.121<br>[0.031, 0.216]    | 0.314                    | -0.893                           | INC    | 0.005<br>[5e-12, 0.038]  | 69.2%<br>[0.0, 94.1]            | 0.090<br>[0.028, 0.189] | [-0.096, 0.352]     |
| HYPO Speech                                             | VIQ       | 645      | -0.050<br>[-0.162, 0.056]  | 0.816                    | -3.146                           | ZERO++ | 0.007<br>[4e-12, 0.037]  | 68.3%<br>[0.0, 92.1]            | 0.165<br>[0.062, 0.327] | [-0.294, 0.184]     |
| HYPO Pain/Temp                                          | VIQ       | 645      | -0.073<br>[-0.180, 0.042]  | 0.688                    | -2.446                           | ZERO++ | 0.003<br>[6e-14, 0.028]  | 44.2%<br>[0.0, 89.5]            | 0.018<br>[0.000, 0.078] | [-0.278, 0.127]     |
| SEEK Visual                                             | VIQ       | 791      | -0.030<br>[-0.133, 0.077]  | 0.904                    | -3.916                           | ZERO++ | 0.005<br>[2e-12, 0.042]  | 64.8%<br>[0.0, 93.5]            | 0.049<br>[0.004, 0.126] | [-0.258, 0.228]     |
| SEEK Tactile                                            | VIQ       | 603      | -0.054<br>[-0.163, 0.059]  | 0.795                    | -3.008                           | ZERO++ | 0.003<br>[9e-13, 0.033]  | 47.5%<br>[0.0, 91.0]            | 0.075<br>[0.010, 0.203] | [-0.269, 0.155]     |
| SEEK Oral Tactile                                       | VIQ       | 804      | 0.029<br>[-0.068, 0.121]   | 0.931                    | -4.249                           | ZERO++ | 0.003<br>[8e-18, 0.023]  | 51.6%<br>[0.0, 90.9]            | 0.055<br>[0.010, 0.134] | [-0.162, 0.209]     |
| SEEK Movement                                           | VIQ       | 808      | 0.032<br>[-0.061, 0.122]   | 0.928                    | -4.215                           | ZERO++ | 0.002<br>[3e-13, 0.025]  | 52.9%<br>[0.0, 91.9]            | 0.029<br>[0.000, 0.095] | [-0.157, 0.218]     |
| Correlations with Nonverbal Cognitive Scores (IQ or DQ) |           |          |                            |                          |                                  |        |                          |                                 |                         |                     |
| Sensory Construct                                       | Correlate | <i>n</i> | <i>r</i> [95% CrI]         | <i>P</i> <sub>ROPE</sub> | log( <i>BF</i> <sub>ROPE</sub> ) | Sig*   | τ <sup>2</sup> [95% CrI] | <i>I</i> <sup>2</sup> [95% CrI] | ICC [95% CrI]           | 95% PI for <i>r</i> |
| HYPER General                                           | NVIQ/DQ   | 1193     | 0.044<br>[-0.037, 0.123]   | 0.923                    | -4.160                           | ZERO++ | 0.003<br>[5e-14, 0.024]  | 64.8%<br>[0.0, 93.5]            | 0.044<br>[0.006, 0.106] | [-0.145, 0.229]     |
| HYPER Auditory                                          | NVIQ/DQ   | 1192     | 0.032<br>[-0.054, 0.111]   | 0.954                    | -4.700                           | ZERO++ | 0.002<br>[2e-14, 0.020]  | 53.7%<br>[0.0, 91.9]            | 0.027<br>[0.000, 0.083] | [-0.142, 0.197]     |
| HYPER Visual                                            | NVIQ/DQ   | 1063     | 0.093<br>[0.007, 0.178]    | 0.568                    | -1.929                           | ZERO+  | 0.003<br>[8e-14, 0.030]  | 57.0%<br>[0.0, 94.0]            | 0.072<br>[0.020, 0.154] | [-0.102, 0.291]     |
| HYPER Tactile                                           | NVIQ/DQ   | 1190     | 0.042<br>[-0.037, 0.123]   | 0.924                    | -4.146                           | ZERO++ | 0.003<br>[3e-12, 0.033]  | 66.3%<br>[0.0, 95.2]            | 0.034<br>[0.000, 0.092] | [-0.162, 0.249]     |
| HYPER Gustatory                                         | NVIQ/DQ   | 1061     | 0.020<br>[-0.072, 0.113]   | 0.946                    | -4.532                           | ZERO++ | 0.003<br>[6e-12, 0.029]  | 56.9%<br>[0.0, 93.0]            | 0.031<br>[0.000, 0.086] | [-0.160, 0.234]     |
| HYPER Olfactory                                         | NVIQ/DQ   | 133      | 0.012<br>[-0.346, 0.387]   | 0.478                    | -1.582                           | ZERO+  | 0.041<br>[3e-12, 0.850]  | 52.7%<br>[0.0, 95.8]            | 0.346<br>[0.016, 0.820] | [-0.667, 0.735]     |
| HYPER Movement                                          | NVIQ/DQ   | 1009     | 0.012<br>[-0.084, 0.134]   | 0.915                    | -4.044                           | ZERO++ | 0.006<br>[2e-11, 0.051]  | 64.1%<br>[0.0, 94.2]            | 0.051<br>[0.007, 0.137] | [-0.227, 0.292]     |
| HYPO Speech                                             | NVIQ/DQ   | 1191     | 0.092<br>[0.010, 0.184]    | 0.574                    | -1.975                           | ZERO+  | 0.005<br>[1e-11, 0.032]  | 70.2%<br>[0.0, 93.9]            | 0.061<br>[0.019, 0.127] | [-0.104, 0.318]     |
| HYPO Pain/Temp                                          | NVIQ/DQ   | 958      | -0.098<br>[-0.214, 0.021]  | 0.515                    | -1.741                           | ZERO+  | 0.020<br>[0.003, 0.061]  | 84.7%<br>[64.5, 96.9]           | 0.134<br>[0.053, 0.255] | [-0.407, 0.232]     |
| SEEK Visual                                             | NVIQ/DQ   | 958      | -0.074<br>[-0.185, 0.040]  | 0.679                    | -2.415                           | ZERO++ | 0.011<br>[1e-09, 0.052]  | 76.6%<br>[9.0, 97.6]            | 0.032<br>[0.000, 0.103] | [-0.349, 0.212]     |
| SEEK Tactile                                            | NVIQ/DQ   | 1171     | -0.087<br>[-0.182, -0.004] | 0.613                    | -2.113                           | ZERO+  | 0.006<br>[1e-11, 0.037]  | 72.4%<br>[0.0, 94.6]            | 0.042<br>[0.005, 0.101] | [-0.322, 0.129]     |
| SEEK Oral Tactile                                       | NVIQ/DQ   | 916      | -0.096<br>[-0.195, 0.018]  | 0.530                    | -1.777                           | ZERO+  | 0.005<br>[1e-13, 0.037]  | 62.3%<br>[0.0, 92.5]            | 0.055<br>[0.007, 0.147] | [-0.318, 0.142]     |
| SEEK Movement                                           | NVIQ/DQ   | 1188     | -0.026<br>[-0.118, 0.067]  | 0.940                    | -4.408                           | ZERO++ | 0.008<br>[3e-12, 0.040]  | 78.2%<br>[8.8, 98.0]            | 0.061<br>[0.020, 0.127] | [-0.269, 0.224]     |

Table continues on following page.

ASRC SENSORY INTEGRATIVE DATA ANALYSIS – SUPPLEMENTAL INFORMATION

Supplemental Table S6 (Continued: Page 7 of 10)

| Correlations with Nonverbal Cognitive Scores (IQ Only)   |           |          |                            |                          |                                  |        |                          |                                 |                         |                     |
|----------------------------------------------------------|-----------|----------|----------------------------|--------------------------|----------------------------------|--------|--------------------------|---------------------------------|-------------------------|---------------------|
| Sensory Construct                                        | Correlate | <i>n</i> | <i>r</i> [95% CrI]         | <i>P</i> <sub>ROPE</sub> | log( <i>BF</i> <sub>ROPE</sub> ) | Sig*   | τ <sup>2</sup> [95% CrI] | <i>I</i> <sup>2</sup> [95% CrI] | ICC [95% CrI]           | 95% PI for <i>r</i> |
| HYPER General                                            | NVIQ      | 967      | 0.028<br>[-0.050, 0.106]   | 0.966                    | -4.999                           | ZERO++ | 0.001<br>[3e-15, 0.013]  | 45.7%<br>[0.0, 89.0]            | 0.026<br>[0.000, 0.079] | [-0.117, 0.167]     |
| HYPER Auditory                                           | NVIQ      | 967      | -0.058<br>[-0.136, 0.020]  | 0.855                    | -3.445                           | ZERO++ | 0.001<br>[2e-12, 0.011]  | 42.0%<br>[0.0, 87.5]            | 0.02<br>[0.00, 0.07]    | [-0.192, 0.076]     |
| HYPER Visual                                             | NVIQ      | 897      | 0.062<br>[-0.023, 0.143]   | 0.825                    | -3.215                           | ZERO++ | 0.003<br>[2e-13, 0.029]  | 63.6%<br>[0.0, 94.0]            | 0.057<br>[0.010, 0.136] | [-0.130, 0.262]     |
| HYPER Tactile                                            | NVIQ      | 964      | 0.045<br>[-0.030, 0.124]   | 0.917                    | -4.076                           | ZERO++ | 0.002<br>[1e-12, 0.018]  | 55.9%<br>[0.0, 91.9]            | 0.025<br>[0.000, 0.077] | [-0.108, 0.210]     |
| HYPER Gustatory                                          | NVIQ      | 895      | 0.022<br>[-0.060, 0.104]   | 0.964                    | -4.958                           | ZERO++ | 0.002<br>[3e-12, 0.021]  | 56.6%<br>[0.0, 92.3]            | 0.022<br>[0.000, 0.070] | [-0.144, 0.198]     |
| HYPER Olfactory                                          | NVIQ      | 108      | 0.006<br>[-0.327, 0.342]   | 0.509                    | -1.708                           | ZERO+  | 0.029<br>[2e-12, 0.588]  | 48.8%<br>[0.0, 95.0]            | 0.260<br>[0.000, 0.772] | [-0.623, 0.655]     |
| HYPER Movement                                           | NVIQ      | 843      | 0.001<br>[-0.091, 0.098]   | 0.961                    | -4.854                           | ZERO++ | 0.003<br>[7e-13, 0.028]  | 55.5%<br>[0.0, 92.4]            | 0.031<br>[0.000, 0.097] | [-0.186, 0.211]     |
| HYPO Speech                                              | NVIQ      | 966      | 0.144<br>[0.069, 0.216]    | 0.12                     | 0.331                            | INC    | 0.002<br>[1e-12, 0.015]  | 54.1%<br>[0.0, 90.8]            | 0.074<br>[0.024, 0.152] | [0.002, 0.292]      |
| HYPO Pain/Temp                                           | NVIQ      | 804      | -0.069<br>[-0.180, 0.040]  | 0.713                    | -2.584                           | ZERO++ | 0.015<br>[9e-10, 0.051]  | 82.9%<br>[36.8, 98.0]           | 0.151<br>[0.060, 0.282] | [-0.367, 0.223]     |
| SEEK Visual                                              | NVIQ      | 804      | -0.059<br>[-0.154, 0.034]  | 0.809                    | -3.096                           | ZERO++ | 0.003<br>[1e-11, 0.028]  | 59.6%<br>[0.0, 92.5]            | 0.021<br>[0.000, 0.077] | [-0.262, 0.142]     |
| SEEK Tactile                                             | NVIQ      | 950      | -0.045<br>[-0.128, 0.039]  | 0.906                    | -3.928                           | ZERO++ | 0.003<br>[3e-12, 0.024]  | 62.6%<br>[0.0, 93.1]            | 0.044<br>[0.005, 0.108] | [-0.229, 0.144]     |
| SEEK Oral Tactile                                        | NVIQ      | 763      | -0.038<br>[-0.130, 0.064]  | 0.909                    | -3.962                           | ZERO++ | 0.002<br>[8e-13, 0.020]  | 43.1%<br>[0.0, 88.9]            | 0.064<br>[0.008, 0.167] | [-0.207, 0.137]     |
| SEEK Movement                                            | NVIQ      | 963      | 0.016<br>[-0.065, 0.096]   | 0.977                    | -5.434                           | ZERO++ | 0.002<br>[3e-11, 0.018]  | 54.1%<br>[0.0, 91.6]            | 0.052<br>[0.010, 0.121] | [-0.150, 0.175]     |
| Correlations with Full-scale Cognitive Scores (IQ or DQ) |           |          |                            |                          |                                  |        |                          |                                 |                         |                     |
| Sensory Construct                                        | Correlate | <i>n</i> | <i>r</i> [95% CrI]         | <i>P</i> <sub>ROPE</sub> | log( <i>BF</i> <sub>ROPE</sub> ) | Sig*   | τ <sup>2</sup> [95% CrI] | <i>I</i> <sup>2</sup> [95% CrI] | ICC [95% CrI]           | 95% PI for <i>r</i> |
| HYPER General                                            | FSIQ/DQ   | 1028     | 0.034<br>[-0.053, 0.118]   | 0.943                    | -4.460                           | ZERO++ | 0.002<br>[3e-12, 0.022]  | 53.7%<br>[0.0, 92.1]            | 0.044<br>[0.005, 0.109] | [-0.147, 0.207]     |
| HYPER Auditory                                           | FSIQ/DQ   | 1027     | 0.008<br>[-0.096, 0.110]   | 0.941                    | -4.457                           | ZERO++ | 0.005<br>[6e-13, 0.039]  | 66.0%<br>[0.0, 93.3]            | 0.037<br>[0.000, 0.102] | [-0.236, 0.239]     |
| HYPER Visual                                             | FSIQ/DQ   | 952      | 0.065<br>[-0.035, 0.156]   | 0.781                    | -2.926                           | ZERO++ | 0.002<br>[1e-12, 0.028]  | 50.3%<br>[0.0, 92.2]            | 0.076<br>[0.021, 0.165] | [-0.144, 0.246]     |
| HYPER Tactile                                            | FSIQ/DQ   | 1024     | 0.034<br>[-0.045, 0.115]   | 0.946                    | -4.508                           | ZERO++ | 0.002<br>[9e-14, 0.017]  | 50.0%<br>[0.0, 91.1]            | 0.030<br>[0.000, 0.089] | [-0.120, 0.192]     |
| HYPER Gustatory                                          | FSIQ/DQ   | 949      | -0.014<br>[-0.095, 0.074]  | 0.975                    | -5.303                           | ZERO++ | 0.002<br>[3e-12, 0.019]  | 51.0%<br>[0.0, 91.1]            | 0.038<br>[0.001, 0.102] | [-0.172, 0.161]     |
| HYPER Olfactory                                          | FSIQ/DQ   | 113      | 0.028<br>[-0.422, 0.454]   | 0.392                    | -1.220                           | ZERO+  | 0.085<br>[1e-12, 1.435]  | 60.5%<br>[0.0, 96.3]            | 0.343<br>[0.000, 0.822] | [-0.769, 0.807]     |
| HYPER Movement                                           | FSIQ/DQ   | 880      | -0.014<br>[-0.105, 0.082]  | 0.956                    | -4.724                           | ZERO++ | 0.002<br>[1e-14, 0.024]  | 48.9%<br>[0.0, 91.2]            | 0.037<br>[0.002, 0.099] | [-0.197, 0.171]     |
| HYPO Speech                                              | FSIQ/DQ   | 1026     | 0.097<br>[-0.001, 0.203]   | 0.521                    | -1.742                           | ZERO+  | 0.010<br>[3e-13, 0.054]  | 78.4%<br>[5.6, 97.9]            | 0.078<br>[0.021, 0.167] | [-0.164, 0.387]     |
| HYPO Pain/Temp                                           | FSIQ/DQ   | 843      | -0.076<br>[-0.199, 0.048]  | 0.650                    | -2.281                           | ZERO+  | 0.019<br>[9e-04, 0.062]  | 82.8%<br>[56.7, 97.2]           | 0.133<br>[0.051, 0.259] | [-0.397, 0.247]     |
| SEEK Visual                                              | FSIQ/DQ   | 844      | -1e-01<br>[-2e-01, 5e-04]  | 0.403                    | -1.267                           | ZERO+  | 0.008<br>[4e-15, 0.050]  | 70.1%<br>[0.0, 93.5]            | 0.033<br>[0.000, 0.117] | [-0.375, 0.154]     |
| SEEK Tactile                                             | FSIQ/DQ   | 1011     | -0.071<br>[-0.170, 0.023]  | 0.729                    | -2.665                           | ZERO++ | 0.007<br>[9e-13, 0.041]  | 72.9%<br>[0.0, 94.3]            | 0.046<br>[0.006, 0.110] | [-0.317, 0.170]     |
| SEEK Oral Tactile                                        | FSIQ/DQ   | 784      | -0.150<br>[-0.255, -0.035] | 0.184                    | -0.169                           | INC    | 0.004<br>[4e-13, 0.037]  | 51.1%<br>[0.0, 91.6]            | 0.047<br>[0.004, 0.132] | [-0.366, 0.078]     |
| SEEK Movement                                            | FSIQ/DQ   | 1022     | -0.021<br>[-0.137, 0.092]  | 0.896                    | -3.827                           | ZERO++ | 0.016<br>[1e-11, 0.066]  | 82.8%<br>[19.8, 98.2]           | 0.083<br>[0.025, 0.168] | [-0.339, 0.298]     |

Table continues on following page.



ASRC SENSORY INTEGRATIVE DATA ANALYSIS – SUPPLEMENTAL INFORMATION

Supplemental Table S6 (Continued: Page 8 of 10)

| Correlations with Full-scale Cognitive Scores (IQ Only) |           |          |                            |                          |                                  |        |                          |                                 |                         |                     |
|---------------------------------------------------------|-----------|----------|----------------------------|--------------------------|----------------------------------|--------|--------------------------|---------------------------------|-------------------------|---------------------|
| Sensory Construct                                       | Correlate | <i>n</i> | <i>r</i> [95% CrI]         | <i>P</i> <sub>ROPE</sub> | log( <i>BF</i> <sub>ROPE</sub> ) | Sig*   | τ <sup>2</sup> [95% CrI] | <i>I</i> <sup>2</sup> [95% CrI] | ICC [95% CrI]           | 95% PI for <i>r</i> |
| HYPER General                                           | FSIQ      | 852      | 0.011<br>[-0.074, 0.096]   | 0.975                    | -5.311                           | ZERO++ | 0.002<br>[5e-12, 0.018]  | 47.3%<br>[0.0, 90.5]            | 0.032<br>[0.000, 0.094] | [-0.148, 0.178]     |
| HYPER Auditory                                          | FSIQ      | 851      | -0.054<br>[-0.151, 0.036]  | 0.831                    | -3.25                            | ZERO++ | 0.003<br>[1e-13, 0.026]  | 58.0%<br>[0.0, 92.0]            | 0.030<br>[0.000, 0.093] | [-0.253, 0.138]     |
| HYPER Visual                                            | FSIQ      | 782      | 0.041<br>[-0.059, 0.131]   | 0.901                    | -3.859                           | ZERO++ | 0.003<br>[3e-13, 0.030]  | 58.1%<br>[0.0, 92.6]            | 0.069<br>[0.012, 0.159] | [-0.175, 0.233]     |
| HYPER Tactile                                           | FSIQ      | 848      | 0.026<br>[-0.057, 0.111]   | 0.956                    | -4.75                            | ZERO++ | 0.002<br>[5e-13, 0.018]  | 48.0%<br>[0.0, 90.8]            | 0.025<br>[0.000, 0.096] | [-0.132, 0.187]     |
| HYPER Gustatory                                         | FSIQ      | 779      | -0.001<br>[-0.092, 0.091]  | 0.967                    | -5.05                            | ZERO++ | 0.003<br>[3e-14, 0.030]  | 61.7%<br>[0.0, 93.2]            | 0.034<br>[0.000, 0.100] | [-0.201, 0.207]     |
| HYPER Olfactory                                         | FSIQ      | 710      | -0.002<br>[-0.114, 0.106]  | 0.925                    | -4.179                           | ZERO++ | 0.003<br>[3e-13, 0.028]  | 48.1%<br>[0.0, 89.8]            | 0.025<br>[0.000, 0.086] | [-0.209, 0.201]     |
| HYPER Movement                                          | FSIQ      | 850      | 0.141<br>[0.056, 0.226]    | 0.161                    | 0.004                            | INC    | 0.003<br>[4e-13, 0.031]  | 63.4%<br>[0.0, 94.1]            | 0.093<br>[0.029, 0.192] | [-0.056, 0.346]     |
| HYPO Speech                                             | FSIQ      | 678      | -0.043<br>[-0.147, 0.063]  | 0.857                    | -3.472                           | ZERO++ | 0.005<br>[4e-15, 0.032]  | 64.0%<br>[0.0, 91.8]            | 0.157<br>[0.059, 0.307] | [-0.264, 0.179]     |
| HYPO Pain/Temp                                          | FSIQ      | 679      | -0.067<br>[-0.186, 0.040]  | 0.716                    | -2.582                           | ZERO++ | 0.003<br>[2e-12, 0.034]  | 50.0%<br>[0.0, 90.8]            | 0.025<br>[0.000, 0.104] | [-0.288, 0.148]     |
| SEEK Visual                                             | FSIQ      | 835      | -0.044<br>[-0.138, 0.050]  | 0.878                    | -3.631                           | ZERO++ | 0.004<br>[3e-14, 0.032]  | 64.1%<br>[0.0, 93.2]            | 0.042<br>[0.001, 0.109] | [-0.258, 0.169]     |
| SEEK Tactile                                            | FSIQ      | 620      | -0.079<br>[-0.186, 0.041]  | 0.649                    | -2.275                           | ZERO+  | 0.003<br>[1e-13, 0.032]  | 46.3%<br>[0.0, 90.4]            | 0.069<br>[0.009, 0.186] | [-0.283, 0.137]     |
| SEEK Oral Tactile                                       | FSIQ      | 846      | 0.026<br>[-0.068, 0.117]   | 0.941                    | -4.423                           | ZERO++ | 0.003<br>[2e-12, 0.031]  | 60.3%<br>[0.0, 93.2]            | 0.058<br>[0.010, 0.142] | [-0.184, 0.228]     |
| SEEK Movement                                           | FSIQ      | 852      | 0.011<br>[-0.074, 0.096]   | 0.975                    | -5.311                           | ZERO++ | 0.002<br>[5e-12, 0.018]  | 47.3%<br>[0.0, 90.5]            | 0.032<br>[0.000, 0.094] | [-0.148, 0.178]     |
| Correlations with VABS Communication                    |           |          |                            |                          |                                  |        |                          |                                 |                         |                     |
| Sensory Construct                                       | Correlate | <i>n</i> | <i>r</i> [95% CrI]         | <i>P</i> <sub>ROPE</sub> | log( <i>BF</i> <sub>ROPE</sub> ) | Sig*   | τ <sup>2</sup> [95% CrI] | <i>I</i> <sup>2</sup> [95% CrI] | ICC [95% CrI]           | 95% PI for <i>r</i> |
| HYPER General                                           | VABS COM  | 1590     | -0.091<br>[-0.228, 0.035]  | 0.554                    | -1.877                           | ZERO+  | 0.036<br>[2e-10, 0.115]  | 88.5%<br>[51.0, 98.7]           | 0.105<br>[0.033, 0.207] | [-0.506, 0.314]     |
| HYPER Auditory                                          | VABS COM  | 1590     | -0.053<br>[-0.186, 0.072]  | 0.769                    | -2.867                           | ZERO++ | 0.031<br>[3e-11, 0.120]  | 88.0%<br>[23.5, 98.9]           | 0.077<br>[0.015, 0.170] | [-0.459, 0.360]     |
| HYPER Visual                                            | VABS COM  | 1455     | -0.016<br>[-0.145, 0.092]  | 0.887                    | -3.727                           | ZERO++ | 0.014<br>[2e-12, 0.079]  | 79.2%<br>[5.2, 98.2]            | 0.093<br>[0.027, 0.204] | [-0.359, 0.298]     |
| HYPER Tactile                                           | VABS COM  | 1581     | -0.065<br>[-0.177, 0.047]  | 0.750                    | -2.755                           | ZERO++ | 0.021<br>[6e-11, 0.080]  | 86.8%<br>[13.4, 98.7]           | 0.084<br>[0.023, 0.173] | [-0.411, 0.281]     |
| HYPER Gustatory                                         | VABS COM  | 1444     | -0.001<br>[-0.115, 0.099]  | 0.936                    | -4.343                           | ZERO++ | 0.009<br>[1e-11, 0.064]  | 76.5%<br>[2.4, 98.0]            | 0.071<br>[0.018, 0.160] | [-0.303, 0.283]     |
| HYPER Olfactory                                         | VABS COM  | 640      | 0.092<br>[-0.331, 0.509]   | 0.385                    | -1.196                           | ZERO+  | 0.075<br>[2e-10, 1.620]  | 61.1%<br>[0.0, 97.1]            | 0.503<br>[0.078, 0.939] | [-0.726, 0.850]     |
| HYPER Movement                                          | VABS COM  | 1392     | -0.057<br>[-0.195, 0.051]  | 0.755                    | -2.778                           | ZERO++ | 0.017<br>[4e-11, 0.092]  | 81.1%<br>[10.2, 98.6]           | 0.068<br>[0.012, 0.172] | [-0.417, 0.281]     |
| HYPO Speech                                             | VABS COM  | 1589     | -0.081<br>[-0.204, 0.013]  | 0.630                    | -2.206                           | ZERO+  | 0.013<br>[1e-10, 0.065]  | 80.1%<br>[3.9, 97.6]            | 0.084<br>[0.027, 0.167] | [-0.401, 0.204]     |
| HYPO Pain/Temp                                          | VABS COM  | 1280     | -0.195<br>[-0.326, -0.063] | 0.070                    | 0.933                            | INC    | 0.018<br>[2e-09, 0.074]  | 78.6%<br>[41.0, 97.6]           | 0.161<br>[0.051, 0.331] | [-0.508, 0.137]     |
| SEEK Visual                                             | VABS COM  | 1286     | -0.119<br>[-0.252, 0.040]  | 0.386                    | -1.201                           | ZERO+  | 0.019<br>[3e-09, 0.102]  | 76.8%<br>[27.6, 98.4]           | 0.061<br>[0.009, 0.173] | [-0.457, 0.273]     |
| SEEK Tactile                                            | VABS COM  | 1571     | -0.141<br>[-0.272, -0.029] | 0.210                    | -0.325                           | INC    | 0.014<br>[5e-13, 0.064]  | 77.7%<br>[7.3, 97.4]            | 0.056<br>[0.012, 0.127] | [-0.455, 0.153]     |
| SEEK Oral Tactile                                       | VABS COM  | 1236     | -0.167<br>[-0.296, -0.043] | 0.122                    | 0.314                            | INC    | 0.013<br>[3e-10, 0.075]  | 74.4%<br>[8.4, 98.3]            | 0.066<br>[0.009, 0.182] | [-0.477, 0.138]     |
| SEEK Movement                                           | VABS COM  | 1574     | -0.086<br>[-0.160, -0.008] | 0.651                    | -2.276                           | ZERO+  | 0.004<br>[5e-12, 0.023]  | 71.8%<br>[4.2, 97.4]            | 0.084<br>[0.031, 0.167] | [-0.264, 0.104]     |

Table continues on following page.

ASRC SENSORY INTEGRATIVE DATA ANALYSIS – SUPPLEMENTAL INFORMATION

Supplemental Table S6 (Continued: Page 9 of 10)

| Correlations with VABS Daily Living Skills |                 |             |                                          |                          |                                  |             |                                       |                                    |                                       |                        |
|--------------------------------------------|-----------------|-------------|------------------------------------------|--------------------------|----------------------------------|-------------|---------------------------------------|------------------------------------|---------------------------------------|------------------------|
| Sensory Construct                          | Correlate       | <i>n</i>    | <i>r</i> [95% CrI]                       | <i>P</i> <sub>ROPE</sub> | log( <i>BF</i> <sub>ROPE</sub> ) | Sig*        | $\tau^2$ [95% CrI]                    | <i>I</i> <sup>2</sup> [95% CrI]    | ICC [95% CrI]                         | 95% PI for <i>r</i>    |
| HYPER General                              | VABS DLS        | 1449        | -0.092<br>[-0.195, -0.001]               | 0.571                    | -1.946                           | ZERO+       | 0.009<br>[2e-12, 0.048]               | 77.7%<br>[5.8, 98.5]               | 0.093<br>[0.027, 0.204]               | [-0.347, 0.172]        |
| HYPER Auditory                             | VABS DLS        | 1449        | -0.069<br>[-0.166, 0.025]                | 0.764                    | -2.837                           | ZERO++      | 0.006<br>[3e-12, 0.054]               | 71.4%<br>[0.0, 95.9]               | 0.072<br>[0.011, 0.192]               | [-0.330, 0.190]        |
| HYPER Visual                               | VABS DLS        | 1445        | -0.035<br>[-0.136, 0.057]                | 0.901                    | -3.875                           | ZERO++      | 0.009<br>[8e-12, 0.044]               | 78.0%<br>[9.0, 98.2]               | 0.086<br>[0.028, 0.182]               | [-0.300, 0.210]        |
| HYPER Tactile                              | VABS DLS        | 1440        | -0.095<br>[-0.174, -0.015]               | 0.554                    | -1.890                           | ZERO+       | 0.003<br>[4e-13, 0.026]               | 62.0%<br>[0.0, 93.9]               | 0.082<br>[0.020, 0.196]               | [-0.283, 0.084]        |
| HYPER Gustatory                            | VABS DLS        | 1433        | -0.031<br>[-0.119, 0.056]                | 0.942                    | -4.464                           | ZERO++      | 0.004<br>[6e-13, 0.035]               | 65.3%<br>[0.0, 94.7]               | 0.067<br>[0.016, 0.160]               | [-0.247, 0.185]        |
| HYPER Olfactory                            | VABS DLS        | 639         | 0.090<br>[-0.376, 0.531]                 | 0.363                    | -1.091                           | INC         | 0.103<br>[4e-11, 1.877]               | 64.2%<br>[0.0, 97.0]               | 0.551<br>[0.103, 0.960]               | [-0.724, 0.908]        |
| HYPER Movement                             | VABS DLS        | 1382        | -0.123<br>[-0.228, -0.031]               | 0.312                    | -0.871                           | INC         | 0.009<br>[4e-14, 0.045]               | 77.9%<br>[10.8, 98.0]              | 0.062<br>[0.011, 0.154]               | [-0.385, 0.127]        |
| HYPO Speech                                | VABS DLS        | 1448        | -0.075<br>[-0.174, 0.016]                | 0.715                    | -2.586                           | ZERO++      | 0.006<br>[6e-12, 0.045]               | 71.4%<br>[0.0, 95.1]               | 0.090<br>[0.026, 0.199]               | [-0.325, 0.162]        |
| HYPO Pain/Temp                             | VABS DLS        | 1277        | -0.164<br>[-0.284, -0.047]               | 0.127                    | 0.252                            | INC         | 0.014<br>[3e-10, 0.062]               | 78.5%<br>[31.4, 98.1]              | 0.165<br>[0.055, 0.342]               | [-0.455, 0.137]        |
| SEEK Visual                                | VABS DLS        | 1283        | -0.117<br>[-0.230, 0.019]                | 0.382                    | -1.190                           | ZERO+       | 0.012<br>[2e-13, 0.070]               | 74.6%<br>[4.8, 97.8]               | 0.063<br>[0.010, 0.164]               | [-0.410, 0.206]        |
| SEEK Tactile                               | VABS DLS        | 1437        | -0.106<br>[-0.186, -0.013]               | 0.443                    | -1.440                           | ZERO+       | 0.002<br>[1e-14, 0.022]               | 51.6%<br>[0.0, 91.8]               | 0.055<br>[0.011, 0.130]               | [-0.267, 0.086]        |
| <b>SEEK Oral Tactile</b>                   | <b>VABS DLS</b> | <b>1234</b> | <b>-0.187</b><br><b>[-0.291, -0.070]</b> | <b>0.059</b>             | <b>1.123</b>                     | <b>SIG+</b> | <b>0.006</b><br><b>[2e-12, 0.055]</b> | <b>65.6%</b><br><b>[0.0, 94.3]</b> | <b>0.067</b><br><b>[0.007, 0.193]</b> | <b>[-0.440, 0.072]</b> |
| SEEK Movement                              | VABS DLS        | 1434        | -0.063<br>[-0.136, 0.014]                | 0.854                    | -3.419                           | ZERO++      | 0.002<br>[1e-13, 0.016]               | 53.8%<br>[0.0, 91.6]               | 0.099<br>[0.034, 0.208]               | [-0.206, 0.099]        |
| Correlations with VABS Socialization       |                 |             |                                          |                          |                                  |             |                                       |                                    |                                       |                        |
| Sensory Construct                          | Correlate       | <i>n</i>    | <i>r</i> [95% CrI]                       | <i>P</i> <sub>ROPE</sub> | log( <i>BF</i> <sub>ROPE</sub> ) | Sig*        | $\tau^2$ [95% CrI]                    | <i>I</i> <sup>2</sup> [95% CrI]    | ICC [95% CrI]                         | 95% PI for <i>r</i>    |
| HYPER General                              | VABS SOC        | 1589        | -0.120<br>[-0.229, -0.018]               | 0.342                    | -1.011                           | INC         | 0.017<br>[5e-12, 0.069]               | 84.9%<br>[34.0, 98.7]              | 0.087<br>[0.029, 0.180]               | [-0.430, 0.197]        |
| HYPER Auditory                             | VABS SOC        | 1589        | -0.078<br>[-0.195, 0.033]                | 0.665                    | -2.333                           | ZERO++      | 0.018<br>[1e-11, 0.093]               | 84.5%<br>[7.4, 98.9]               | 0.071<br>[0.014, 0.165]               | [-0.427, 0.276]        |
| HYPER Visual                               | VABS SOC        | 1455        | -0.042<br>[-0.149, 0.055]                | 0.853                    | -3.406                           | ZERO++      | 0.007<br>[1e-12, 0.043]               | 70.9%<br>[0.0, 93.9]               | 0.085<br>[0.027, 0.182]               | [-0.299, 0.193]        |
| HYPER Tactile                              | VABS SOC        | 1580        | -0.122<br>[-0.236, -0.026]               | 0.306                    | -0.847                           | INC         | 0.009<br>[4e-13, 0.060]               | 76.5%<br>[3.4, 98.0]               | 0.080<br>[0.022, 0.177]               | [-0.406, 0.157]        |
| HYPER Gustatory                            | VABS SOC        | 1443        | -0.045<br>[-0.171, 0.059]                | 0.834                    | -3.281                           | ZERO++      | 0.012<br>[2e-12, 0.083]               | 78.5%<br>[2.9, 98.4]               | 0.075<br>[0.019, 0.170]               | [-0.375, 0.274]        |
| HYPER Olfactory                            | VABS SOC        | 640         | 0.087<br>[-0.392, 0.553]                 | 0.369                    | -1.131                           | ZERO+       | 0.119<br>[2e-11, 2.213]               | 65.4%<br>[0.0, 97.2]               | 0.520<br>[0.092, 0.936]               | [-0.757, 0.914]        |
| HYPER Movement                             | VABS SOC        | 1391        | -0.088<br>[-0.211, 0.017]                | 0.580                    | -1.979                           | ZERO+       | 0.013<br>[4e-11, 0.061]               | 78.1%<br>[7.5, 98.0]               | 0.062<br>[0.013, 0.151]               | [-0.397, 0.196]        |
| HYPO Speech                                | VABS SOC        | 1588        | -0.163<br>[-0.289, -0.050]               | 0.135                    | 0.193                            | INC         | 0.027<br>[9e-12, 0.092]               | 86.7%<br>[46.1, 98.6]              | 0.105<br>[0.039, 0.202]               | [-0.516, 0.206]        |
| <b>HYPO Pain/Temp</b>                      | <b>VABS SOC</b> | <b>1279</b> | <b>-0.182</b><br><b>[-0.267, -0.091]</b> | <b>0.038</b>             | <b>1.555</b>                     | <b>SIG+</b> | <b>0.002</b><br><b>[1e-13, 0.028]</b> | <b>50.8%</b><br><b>[0.0, 92.8]</b> | <b>0.157</b><br><b>[0.045, 0.332]</b> | <b>[-0.361, 0.006]</b> |
| SEEK Visual                                | VABS SOC        | 1285        | -0.144<br>[-0.275, -0.007]               | 0.237                    | -0.491                           | INC         | 0.009<br>[5e-11, 0.065]               | 65.1%<br>[0.0, 93.3]               | 0.052<br>[0.008, 0.142]               | [-0.419, 0.174]        |
| SEEK Tactile                               | VABS SOC        | 1570        | -0.136<br>[-0.251, -0.037]               | 0.225                    | -0.416                           | INC         | 0.014<br>[2e-11, 0.065]               | 81.5%<br>[5.2, 98.1]               | 0.057<br>[0.011, 0.132]               | [-0.444, 0.159]        |
| SEEK Oral Tactile                          | VABS SOC        | 1235        | -2e-01<br>[-3e-01, -9e-04]               | 0.188                    | -0.209                           | INC         | 0.026<br>[1e-11, 0.158]               | 79.5%<br>[12.0, 98.9]              | 0.093<br>[0.012, 0.240]               | [-0.575, 0.273]        |
| SEEK Movement                              | VABS SOC        | 1573        | -0.119<br>[-0.194, -0.043]               | 0.307                    | -0.839                           | INC         | 0.002<br>[1e-12, 0.023]               | 52.8%<br>[0.0, 93.7]               | 0.087<br>[0.032, 0.174]               | [-0.282, 0.055]        |

Table continues on following page.

ASRC SENSORY INTEGRATIVE DATA ANALYSIS – SUPPLEMENTAL INFORMATION

Supplemental Table S6 (Continued: Page 10 of 10)

| Correlations with VABS Adaptive Behavior Composite |                 |             |                                          |                          |                                  |             |                                       |                                    |                                       |                        |
|----------------------------------------------------|-----------------|-------------|------------------------------------------|--------------------------|----------------------------------|-------------|---------------------------------------|------------------------------------|---------------------------------------|------------------------|
| Sensory Construct                                  | Correlate       | <i>n</i>    | <i>r</i> [95% CrI]                       | <i>P</i> <sub>ROPE</sub> | log( <i>BF</i> <sub>ROPE</sub> ) | Sig*        | τ <sup>2</sup> [95% CrI]              | <i>I</i> <sup>2</sup> [95% CrI]    | ICC [95% CrI]                         | 95% PI for <i>r</i>    |
| HYPER General                                      | VABS ABC        | 1472        | -0.111<br>[-0.245, 0.003]                | 0.422                    | -1.357                           | ZERO+       | 0.022<br>[4e-10, 0.097]               | 83.6%<br>[24.8, 98.9]              | 0.096<br>[0.029, 0.202]               | [-0.481, 0.239]        |
| HYPER Auditory                                     | VABS ABC        | 1472        | -0.093<br>[-0.248, 0.049]                | 0.535                    | -1.788                           | ZERO+       | 0.046<br>[9e-11, 0.169]               | 88.8%<br>[33.9, 99.1]              | 0.098<br>[0.022, 0.215]               | [-0.548, 0.388]        |
| HYPER Visual                                       | VABS ABC        | 1339        | -0.009<br>[-0.116, 0.085]                | 0.940                    | -4.408                           | ZERO++      | 0.004<br>[1e-11, 0.041]               | 61.7%<br>[0.0, 94.0]               | 0.085<br>[0.026, 0.189]               | [-0.260, 0.205]        |
| HYPER Tactile                                      | VABS ABC        | 1463        | -0.111<br>[-0.228, -0.005]               | 0.404                    | -1.270                           | ZERO+       | 0.013<br>[8e-12, 0.073]               | 79.7%<br>[4.9, 98.3]               | 0.089<br>[0.023, 0.197]               | [-0.422, 0.202]        |
| HYPER Gustatory                                    | VABS ABC        | 1327        | -0.027<br>[-0.162, 0.091]                | 0.866                    | -3.539                           | ZERO++      | 0.015<br>[3e-12, 0.098]               | 78.8%<br>[4.3, 98.7]               | 0.082<br>[0.020, 0.189]               | [-0.384, 0.317]        |
| HYPER Olfactory                                    | VABS ABC        | 640         | 0.093<br>[-0.362, 0.519]                 | 0.376                    | -1.178                           | ZERO+       | 0.078<br>[2e-10, 1.606]               | 59.1%<br>[0.0, 96.7]               | 0.519<br>[0.076, 0.941]               | [-0.701, 0.885]        |
| HYPER Movement                                     | VABS ABC        | 1277        | -0.097<br>[-0.232, 0.025]                | 0.521                    | -1.735                           | ZERO+       | 0.019<br>[6e-10, 0.091]               | 81.1%<br>[17.0, 98.5]              | 0.082<br>[0.016, 0.200]               | [-0.454, 0.250]        |
| HYPO Speech                                        | VABS ABC        | 1472        | -0.130<br>[-0.273, -0.010]               | 0.319                    | -0.894                           | INC         | 0.028<br>[2e-11, 0.109]               | 84.9%<br>[17.2, 98.6]              | 0.114<br>[0.037, 0.227]               | [-0.530, 0.238]        |
| <b>HYPO Pain/Temp</b>                              | <b>VABS ABC</b> | <b>1164</b> | <b>-0.199</b><br><b>[-0.310, -0.082]</b> | <b>0.043</b>             | <b>1.427</b>                     | <b>SIG+</b> | <b>0.009</b><br><b>[1e-11, 0.051]</b> | <b>70.4%</b><br><b>[6.5, 97.7]</b> | <b>0.173</b><br><b>[0.052, 0.362]</b> | <b>[-0.449, 0.070]</b> |
| SEEK Visual                                        | VABS ABC        | 1170        | -0.150<br>[-0.281, 0.013]                | 0.241                    | -0.518                           | INC         | 0.016<br>[2e-11, 0.100]               | 73.2%<br>[6.9, 98.2]               | 0.076<br>[0.011, 0.208]               | [-0.473, 0.235]        |
| SEEK Tactile                                       | VABS ABC        | 1453        | -0.147<br>[-0.259, -0.046]               | 0.155                    | 0.039                            | INC         | 0.009<br>[4e-13, 0.063]               | 75.4%<br>[0.0, 95.4]               | 0.060<br>[0.013, 0.139]               | [-0.428, 0.146]        |
| SEEK Oral Tactile                                  | VABS ABC        | 1121        | -0.180<br>[-0.335, -0.018]               | 0.132                    | 0.208                            | INC         | 0.022<br>[1e-13, 0.143]               | 76.2%<br>[8.3, 98.9]               | 0.097<br>[0.012, 0.256]               | [-0.565, 0.234]        |
| SEEK Movement                                      | VABS ABC        | 1456        | -0.109<br>[-0.183, -0.035]               | 0.399                    | -1.268                           | ZERO+       | 0.002<br>[1e-13, 0.018]               | 51.3%<br>[0.0, 92.6]               | 0.097<br>[0.035, 0.194]               | [-0.260, 0.047]        |

Correlation values are derived from random-effects integrative data analysis (IDA) models (see Supplemental Table S3 for full model specification and calculation of the effect size parameter). Practically significant effects ( $\log(BF_{ROPE}) > 1.1$ ) are colored blue (positive effects) or orange (negative effects) and bolded, and trivially small effects (i.e.,  $\log(BF_{ROPE}) < -1.1$ ) are highlighted in gray. Inconclusive effects ( $-1.1 < BF_{ROPE} < 1.1$ ) are colored yellow. CrI = Bayesian highest-density credible interval; *P*<sub>ROPE</sub> = posterior probability that the effect size (*r*) falls within [-.1, .1]; log(*BF*<sub>ROPE</sub>) = natural logarithm of the ROPE Bayes factor; τ<sup>2</sup> = raw heterogeneity (on scale of beta coefficient); *I*<sup>2</sup> = standardized heterogeneity coefficient (presented as percentage); ICC = intraclass correlation (proportion of outcome variance explained by random slope/intercept terms); PI = prediction interval; HYPER = hyperreactivity; HYPO = hyporeactivity; SEEK = sensory seeking; VIQ = verbal IQ; NVIQ = nonverbal IQ; FSIQ = full-scale IQ; DQ = developmental quotient; VABS = Vineland Adaptive Behavior Scales (Sparrow, 2011); COM = VABS Communication; DLS = VABS Daily Living Skills; SOC = VABS Socialization; ABC = VABS Adaptive Behavior Composite; PSYC = psychiatric symptoms as measured by the Achenbach System of Empirically Based Assessment (Achenbach, 2009), a version of the Behavior Assessment System for Children (Reynolds & Kamphaus, 2015), or the Conners-3 (Conners, 2008); INT = internalizing symptoms; EXT = externalizing symptoms; ADHD = attention deficit hyperactivity disorder symptoms; SRS = Social Responsiveness Scale (Constantino et al., 2003; Constantino & Gruber, 2012); RBS-R = Repetitive Behavior Scale-Revised (Bodfish et al., 2000); RSM = repetitive sensory motor (stereotypy); SIB = self-injurious behavior; RSC = ritualistic/sameness and compulsive behavior.

\* Significance levels are derived from values of *BF*<sub>ROPE</sub> and an interval null hypothesis (ROPE) of *r* = [-.1, .1]: ZERO++ = strong evidence for null hypothesis ( $\log(BF_{ROPE}) < -2.3$ ); ZERO+ = moderate evidence for null hypothesis ( $\log(BF_{ROPE}) < -1.1$ ); SIG++ = strong evidence for alternative hypothesis ( $\log(BF_{ROPE}) > 2.3$ ); SIG+ = moderate evidence for alternative hypothesis ( $\log(BF_{ROPE}) > 1.1$ ); INC = inconclusive evidence for or against null hypothesis ( $-1.1 < BF_{ROPE} < 1.1$ ).

Supplemental Table S7

Meta-analytic summary effects and heterogeneity parameters for binary correlates

| Sensory Construct        | Correlate        | <i>n</i>   | <i>d</i> [95% CrI]          | <i>P</i> <sub>ROPE</sub> | log( <i>BF</i> <sub>ROPE</sub> ) | Sig*        | $\tau^2$ [95% CrI]          | <i>I</i> <sup>2</sup> [95% CrI] | ICC [95% CrI]               | 95% PI for <i>d</i>    |
|--------------------------|------------------|------------|-----------------------------|--------------------------|----------------------------------|-------------|-----------------------------|---------------------------------|-----------------------------|------------------------|
| HYPER General            | Sex (M > F)      | 3865       | 0.008 [-0.122, 0.132]       | 0.996                    | -6.526                           | ZERO++      | 0.004 [8e-06, 0.049]        | 50.5% [0.0, 90.5]               | 0.078 [0.029, 0.154]        | [-0.253, 0.245]        |
| HYPER Auditory           | Sex (M > F)      | 3859       | 0.009 [-0.115, 0.128]       | 0.997                    | -6.742                           | ZERO++      | 0.006 [1e-05, 0.068]        | 61.3% [0.0, 93.3]               | 0.044 [0.010, 0.111]        | [-0.281, 0.277]        |
| HYPER Visual             | Sex (M > F)      | 3699       | -0.010 [-0.128, 0.105]      | 0.997                    | -6.664                           | ZERO++      | 0.003 [6e-06, 0.048]        | 48.6% [0.0, 91.2]               | 0.095 [0.037, 0.185]        | [-0.250, 0.210]        |
| HYPER Tactile            | Sex (M > F)      | 3836       | -0.037 [-0.177, 0.093]      | 0.984                    | -5.096                           | ZERO++      | 0.006 [1e-05, 0.072]        | 58.5% [0.0, 92.6]               | 0.087 [0.029, 0.176]        | [-0.352, 0.240]        |
| HYPER Gustatory          | Sex (M > F)      | 3681       | 0.162 [0.036, 0.294]        | 0.724                    | -1.955                           | ZERO+       | 0.003 [7e-06, 0.045]        | 44.9% [0.0, 89.0]               | 0.050 [0.015, 0.120]        | [-0.070, 0.400]        |
| HYPER Olfactory          | Sex (M > F)      | 2467       | -0.063 [-0.466, 0.299]      | 0.799                    | -2.372                           | ZERO++      | 0.023 [5e-05, 0.969]        | 41.4% [0.0, 94.3]               | 0.188 [0.002, 0.679]        | [-0.902, 0.740]        |
| HYPER Movement           | Sex (M > F)      | 3523       | 0.071 [-0.065, 0.214]       | 0.961                    | -4.193                           | ZERO++      | 0.004 [9e-06, 0.061]        | 47.5% [0.0, 90.3]               | 0.036 [0.006, 0.103]        | [-0.180, 0.354]        |
| HYPO Speech              | Sex (M > F)      | 3854       | 0.066 [-0.058, 0.186]       | 0.987                    | -5.297                           | ZERO++      | 0.004 [7e-06, 0.049]        | 49.8% [0.0, 90.8]               | 0.064 [0.021, 0.138]        | [-0.179, 0.302]        |
| HYPO Pain/Temp           | Sex (M > F)      | 3483       | -0.054 [-0.182, 0.077]      | 0.982                    | -5.008                           | ZERO++      | 0.003 [7e-06, 0.065]        | 47.7% [0.0, 92.0]               | 0.156 [0.060, 0.299]        | [-0.317, 0.213]        |
| SEEK Visual              | Sex (M > F)      | 3501       | 0.084 [-0.132, 0.250]       | 0.921                    | -3.434                           | ZERO++      | 0.014 [5e-05, 0.119]        | 61.9% [0.0, 91.2]               | 0.067 [0.015, 0.170]        | [-0.362, 0.441]        |
| SEEK Tactile             | Sex (M > F)      | 3815       | -0.043 [-0.166, 0.090]      | 0.992                    | -5.808                           | ZERO++      | 0.004 [8e-06, 0.064]        | 51.9% [0.0, 92.2]               | 0.044 [0.009, 0.110]        | [-0.313, 0.224]        |
| SEEK Oral Tactile        | Sex (M > F)      | 3366       | -0.068 [-0.254, 0.082]      | 0.916                    | -3.366                           | ZERO++      | 0.008 [2e-05, 0.097]        | 54.4% [0.0, 91.4]               | 0.060 [0.011, 0.165]        | [-0.448, 0.241]        |
| SEEK Movement            | Sex (M > F)      | 3823       | 0.031 [-0.137, 0.183]       | 0.978                    | -4.786                           | ZERO++      | 0.016 [3e-05, 0.167]        | 73.9% [0.0, 95.7]               | 0.101 [0.025, 0.270]        | [-0.432, 0.473]        |
| HYPER General            | ID Status        | 1030       | -0.059 [-0.360, 0.242]      | 0.784                    | -2.268                           | ZERO+       | 0.018 [4e-05, 0.266]        | 47.4% [0.0, 90.3]               | 0.067 [0.003, 0.220]        | [-0.640, 0.515]        |
| HYPER Auditory           | ID Status        | 1029       | -0.131 [-0.421, 0.153]      | 0.678                    | -1.721                           | ZERO+       | 0.022 [5e-05, 0.340]        | 54.6% [0.0, 92.6]               | 0.058 [0.000, 0.235]        | [-0.765, 0.466]        |
| HYPER Visual             | ID Status        | 959        | -0.134 [-0.397, 0.140]      | 0.683                    | -1.754                           | ZERO+       | 0.012 [3e-05, 0.224]        | 43.5% [0.0, 90.4]               | 0.083 [0.013, 0.221]        | [-0.630, 0.387]        |
| HYPER Tactile            | ID Status        | 1026       | -0.024 [-0.334, 0.284]      | 0.814                    | -2.445                           | ZERO++      | 0.025 [5e-05, 0.523]        | 54.0% [0.0, 94.3]               | 0.068 [0.000, 0.313]        | [-0.746, 0.684]        |
| HYPER Gustatory          | ID Status        | 956        | -0.071 [-0.402, 0.228]      | 0.771                    | -2.199                           | ZERO+       | 0.038 [8e-05, 0.452]        | 64.2% [0.0, 94.0]               | 0.067 [0.000, 0.299]        | [-0.846, 0.648]        |
| HYPER Olfactory          | ID Status        | 109        | -0.258 [-1.443, 0.849]      | 0.297                    | -0.114                           | INC         | 0.345 [6e-04, 9.365]        | 58.7% [0.0, 96.1]               | 0.515 [0.051, 0.939]        | [-3.319, 2.616]        |
| HYPER Movement           | ID Status        | 887        | 0.134 [-0.248, 0.481]       | 0.615                    | -1.455                           | ZERO+       | 0.065 [2e-04, 0.740]        | 69.4% [0.0, 95.0]               | 0.102 [0.000, 0.410]        | [-0.838, 1.054]        |
| HYPO Speech              | ID Status        | 1027       | -0.148 [-0.435, 0.131]      | 0.640                    | -1.546                           | ZERO+       | 0.023 [6e-05, 0.337]        | 58.1% [0.0, 93.4]               | 0.115 [0.030, 0.300]        | [-0.811, 0.471]        |
| HYPO Pain/Temp           | ID Status        | 854        | 0.415 [0.035, 0.784]        | 0.117                    | 1.044                            | INC         | 0.078 [9e-04, 0.519]        | 73.3% [9.8, 97.7]               | 0.211 [0.066, 0.431]        | [-0.487, 1.309]        |
| SEEK Visual              | ID Status        | 855        | 0.359 [-0.135, 0.762]       | 0.216                    | 0.308                            | INC         | 0.063 [2e-04, 1.095]        | 59.6% [0.0, 94.5]               | 0.100 [0.000, 0.484]        | [-0.754, 1.384]        |
| SEEK Tactile             | ID Status        | 1013       | 0.127 [-0.178, 0.429]       | 0.675                    | -1.728                           | ZERO+       | 0.038 [9e-05, 0.402]        | 64.8% [0.0, 93.6]               | 0.090 [0.009, 0.287]        | [-0.582, 0.849]        |
| <b>SEEK Oral Tactile</b> | <b>ID Status</b> | <b>797</b> | <b>0.422 [0.073, 0.768]</b> | <b>0.092</b>             | <b>1.305</b>                     | <b>SIG+</b> | <b>0.026 [6e-05, 0.467]</b> | <b>51.7% [0.0, 92.8]</b>        | <b>0.093 [0.010, 0.317]</b> | <b>[-0.314, 1.149]</b> |
| SEEK Movement            | ID Status        | 1024       | 0.087 [-0.222, 0.363]       | 0.763                    | -2.162                           | ZERO+       | 0.035 [9e-05, 0.355]        | 65.0% [0.0, 93.4]               | 0.091 [0.011, 0.289]        | [-0.621, 0.749]        |

Correlation values are derived from random-effects integrative data analysis (IDA) models (see Supplemental Table S3 for full model specification and calculation of the effect size parameter). Practically significant effects ( $\log(BF_{ROPE}) > 1.1$ ) are colored blue (positive effects) or orange (negative effects) and bolded, and trivially small effects ( $\log(BF_{ROPE}) < -1.1$ ) are highlighted in gray. Inconclusive effects ( $-1.1 < \log(BF_{ROPE}) < 1.1$ ) are colored yellow. **CrI** = Bayesian highest-density credible interval; **P**<sub>ROPE</sub> = posterior probability that the effect size (*d*) falls within [-0.2, 0.2]; **log**(*BF*<sub>ROPE</sub>) = natural logarithm of the ROPE Bayes factor;  $\tau^2$  = raw heterogeneity (on scale of beta coefficient); **I**<sup>2</sup> = standardized heterogeneity coefficient; **ICC** = intraclass correlation (proportion of outcome variance explained by random slope/intercept terms); **PI** = prediction interval; **HYPER** = hyperreactivity; **HYPO** = hyporeactivity; **SEEK** = sensory seeking; **ID** = intellectual disability. \* Significance levels are derived from values of *BF*<sub>ROPE</sub> and an interval null hypothesis (ROPE) of *d* = [-0.2, 0.2]: **ZERO++** = strong evidence for null hypothesis ( $\log(BF_{ROPE}) < -2.3$ ); **ZERO+** = moderate evidence for null hypothesis ( $\log(BF_{ROPE}) < -1.1$ ); **SIG++** = strong evidence for alternative hypothesis ( $\log(BF_{ROPE}) > 2.3$ ); **SIG+** = moderate evidence for alternative hypothesis ( $\log(BF_{ROPE}) > 1.1$ ); **INC** = inconclusive evidence for or against null hypothesis ( $-1.1 < BF_{ROPE} < 1.1$ ).

### Supplemental References

- Achenbach, T. M. (2009). *Achenbach System of Empirically Based Assessment (ASEBA): Development, findings, theory, and applications*. University of Vermont, Research Center of Children, Youth & Families.
- Ausderau, K. K., Sideris, J., Furlong, M., Little, L. M., Bulluck, J., & Baranek, G. T. (2014). National survey of sensory features in children with ASD: Factor structure of the Sensory Experience Questionnaire (3.0). *Journal of Autism and Developmental Disorders*, *44*(4), 915–925. <https://doi.org/10.1007/s10803-013-1945-1>
- Baranek, G. T. (1999). *Sensory Experiences Questionnaire (SEQ), version 2.1* [Questionnaire]. University of North Carolina at Chapel Hill.
- Baranek, G. T. (2009). *Sensory Experiences Questionnaire (SEQ), version 3.0* [Questionnaire]. University of North Carolina at Chapel Hill.
- Baranek, G. T., David, F. J., Poe, M. D., Stone, W. L., & Watson, L. R. (2006). Sensory Experiences Questionnaire: Discriminating sensory features in young children with autism, developmental delays, and typical development. *Journal of Child Psychology and Psychiatry*, *47*(6), 591–601. <https://doi.org/10.1111/j.1469-7610.2005.01546.x>
- Bishop, S. L., Hus, V., Duncan, A., Huerta, M., Gotham, K., Pickles, A., Kreiger, A., Buja, A., Lund, S., & Lord, C. (2013). Subcategories of restricted and repetitive behaviors in children with autism spectrum disorders. *Journal of Autism and Developmental Disorders*, *43*(6), 1287–1297. <https://doi.org/10.1007/s10803-012-1671-0>
- Bock, R. D., & Aitkin, M. (1981). Marginal maximum likelihood estimation of item parameters: Application of an EM algorithm. *Psychometrika*, *46*(4), 443–459. <https://doi.org/10.1007/bf02293801>

- Bodfish, J. W., Symons, F. J., Parker, D. E., & Lewis, M. H. (2000). Varieties of repetitive behavior in autism: Comparisons to mental retardation. *Journal of Autism and Developmental Disorders, 30*(3), 237–243. <https://doi.org/10.1023/A:1005596502855>
- Boyd, B. A., Baranek, G. T., Sideris, J., Poe, M. D., Watson, L. R., Patten, E., & Miller, H. (2010). Sensory features and repetitive behaviors in children with autism and developmental delays. *Autism Research, 3*(2), 78–87. <https://doi.org/10.1002/aur.124>
- Burns, C. O., Dixon, D. R., Novack, M., & Granpeesheh, D. (2017). A systematic review of assessments for sensory processing abnormalities in autism spectrum disorder. *Review Journal of Autism and Developmental Disorders, 4*(3), 209–224. <https://doi.org/10.1007/s40489-017-0109-1>
- Cai, L., Chung, S. W., & Lee, T. (2023). Incremental model fit assessment in the case of categorical data: Tucker–Lewis index for item response theory modeling. *Prevention Science, 24*(3), 455–466. <https://doi.org/10.1007/s11121-021-01253-4>
- Cai, L., & Monroe, S. (2014). *A new statistic for evaluating item response theory models for ordinal data* (CRESST Report 839; pp. 1–28). University of California, National Center for Research on Evaluation, Standards, and Student Testing (CRESST). <https://eric.ed.gov/?id=ED555726>
- Cascio, C. J., Gu, C., Schauder, K. B., Key, A. P., & Yoder, P. (2015). Somatosensory event-related potentials and association with tactile behavioral responsiveness patterns in children with ASD. *Brain Topography, 28*(6), 895–903. <https://doi.org/10.1007/s10548-015-0439-1>
- Cascio, C. J., Lorenzi, J., & Baranek, G. T. (2016). Self-reported pleasantness ratings and examiner-coded defensiveness in response to touch in children with ASD: Effects of

- stimulus material and bodily location. *Journal of Autism and Developmental Disorders*, 46(5), 1528–1537. <https://doi.org/10.1007/s10803-013-1961-1>
- Chalmers, R. P. (2012). mirt: A multidimensional item response theory package for the R environment. *Journal of Statistical Software*, 48(6), 1–29. <https://doi.org/10.18637/jss.v048.i06>
- Christensen, A. P., Garrido, L. E., Guerra-Peña, K., & Golino, H. (2023). Comparing community detection algorithms in psychometric networks: A Monte Carlo simulation. *Behavior Research Methods*, Advance online publication. <https://doi.org/10.3758/s13428-023-02106-4>
- Conners, C. K. (2008). *Conners 3* (3rd ed.). Multi-Health Systems.
- Constantino, J. N., Davis, S. A., Todd, R. D., Schindler, M. K., Gross, M. M., Brophy, S. L., Metzger, L. M., Shoushtari, C. S., Splinter, R., & Reich, W. (2003). Validation of a brief quantitative measure of autistic traits: Comparison of the Social Responsiveness Scale with the Autism Diagnostic Interview-Revised. *Journal of Autism and Developmental Disorders*, 33(4), 427–433. <https://doi.org/10.1023/A:1025014929212>
- Constantino, J. N., & Gruber, C. P. (2012). *Social Responsiveness Scale–Second Edition (SRS-2): Manual* (2nd ed.). Western Psychological Services.
- Cooksey, R. W., & Soutar, G. N. (2006). Coefficient beta and hierarchical item clustering: An analytical procedure for establishing and displaying the dimensionality and homogeneity of summated scales. *Organizational Research Methods*, 9(1), 78–98. <https://doi.org/10.1177/1094428105283939>
- Donkers, F. C. L., Schipul, S. E., Baranek, G. T., Cleary, K. M., Willoughby, M. T., Evans, A. M., Bulluck, J. C., Lovmo, J. E., & Belger, A. (2015). Attenuated auditory event-related potentials and associations with atypical sensory response patterns in children with

autism. *Journal of Autism and Developmental Disorders*, 45(2), 506–523.

<https://doi.org/10.1007/s10803-013-1948-y>

Dunn, W. (1999). *Sensory Profile: User's manual*. Psychological Corporation.

Dunn, W. (2014). *Sensory Profile 2: User's manual*. Pearson.

Dwyer, P., Ferrer, E., Saron, C. D., & Rivera, S. M. (2022). Exploring sensory subgroups in typical development and autism spectrum development using factor mixture modelling.

*Journal of Autism and Developmental Disorders*, 52(9), 3840–3860.

<https://doi.org/10.1007/s10803-021-05256-6>

Elliott, C. D. (2007). *Differential Ability Scales* (2nd ed.). Pearson/Psychological Corp.

Feldman, J. I., Cassidy, M., Liu, Y., Kirby, A. V., Wallace, M. T., & Woynaroski, T. G. (2020).

Relations between sensory responsiveness and features of autism in children. *Brain Sciences*, 10(11), Article 11. <https://doi.org/10.3390/brainsci10110775>

Feldman, J. I., Raj, S., Bowman, S. M., Santapuram, P., Golden, A. J., Daly, C., Dunham, K., Suzman, E., Augustine, A. E., Garla, V., Muhumuza, A., Cascio, C. J., Williams, K. L.,

Kirby, A. V., Keceli, -Kaysili Bahar, & Woynaroski, T. G. (2021). Sensory responsiveness is linked with communication in infant siblings of children with and without autism. *Journal of Speech, Language, and Hearing Research*, 64(6), 1964–1976.

[https://doi.org/10.1044/2021\\_JSLHR-20-00196](https://doi.org/10.1044/2021_JSLHR-20-00196)

Foss-Feig, J. H., Heacock, J. L., & Cascio, C. J. (2012). Tactile responsiveness patterns and their association with core features in autism spectrum disorders. *Research in Autism Spectrum Disorders*, 6(1), 337–344. <https://doi.org/10.1016/j.rasd.2011.06.007>

<https://doi.org/10.1016/j.rasd.2011.06.007>

Gibbons, R. D., Bock, R. D., Hedeker, D., Weiss, D. J., Segawa, E., Bhaumik, D. K., Kupfer, D.

J., Frank, E., Grochocinski, V. J., & Stover, A. (2007). Full-information item bifactor



analysis of graded response data. *Applied Psychological Measurement*, 31(1), 4–19.

<https://doi.org/10.1177/0146621606289485>

Golino, H. F., & Christensen, A. (2020). *EGAnet: Exploratory Graph Analysis—A Framework for Estimating the Number of Dimensions in Multivariate Data Using Network Psychometrics*. <https://CRAN.R-project.org/package=EGAnet>

Golino, H. F., Shi, D., Christensen, A. P., Garrido, L. E., Nieto, M. D., Sadana, R., Thiyagarajan, J. A., & Martinez-Molina, A. (2020). Investigating the performance of exploratory graph analysis and traditional techniques to identify the number of latent factors: A simulation and tutorial. *Psychological Methods*, 25(3), 292–320.

<https://doi.org/10.1037/met0000255>

Green, S. B., & Yang, Y. (2009). Reliability of summed item scores using structural equation modeling: An alternative to coefficient alpha. *Psychometrika*, 74(1), 155–167.

<https://doi.org/10.1007/s11336-008-9099-3>

Lane, A. E., Simpson, K., Masi, A., Grove, R., Moni, M. A., Montgomery, A., Roberts, J., Silove, N., Whalen, O., Whitehouse, A. J. O., & Eapen, V. (2022). Patterns of sensory modulation by age and sex in young people on the autism spectrum. *Autism Research*, 15(10), 1840–1854. <https://doi.org/10.1002/aur.2762>

Lee, H., Chen, Y.-J., Sideris, J., Watson, L. R., Crais, E. R., & Baranek, G. T. (2022). Sensory features of young children from a large community sample: Latent factor structures of the Sensory Experiences Questionnaire (Version 2.1, Short Form). *The American Journal of Occupational Therapy*, 76(3), Article 7603205140.

<https://doi.org/10.5014/ajot.2022.046995>

Little, L. M., Freuler, A. C., Houser, M. B., Guckian, L., Carbine, K., David, F. J., & Baranek, G. T. (2011). Psychometric validation of the Sensory Experiences Questionnaire. *The*

*American Journal of Occupational Therapy*, 65(2), 207–210.

<https://doi.org/10.5014/ajot.2011.000844>

Maydeu-Olivares, A. (2013). Goodness-of-fit assessment of item response theory models.

*Measurement: Interdisciplinary Research and Perspectives*, 11(3), 71–101.

<https://doi.org/10.1080/15366367.2013.831680>

Maydeu-Olivares, A., & Joe, H. (2014). Assessing approximate fit in categorical data analysis.

*Multivariate Behavioral Research*, 49(4), 305–328.

<https://doi.org/10.1080/00273171.2014.911075>

McIntosh, D. N., Miller, L. J., & Shyu, V. (1999). Development and validation of the Short Sensory Profile. In W. Dunn (Ed.), *Sensory Profile manual* (pp. 59–73). Psychological Corporation.

Monroe, S., & Cai, L. (2015). Evaluating structural equation models for categorical outcomes: A new test statistic and a practical challenge of interpretation. *Multivariate Behavioral Research*, 50(6), 569–583. <https://doi.org/10.1080/00273171.2015.1032398>

*Research*, 50(6), 569–583. <https://doi.org/10.1080/00273171.2015.1032398>

Mullen, E. M. (1995). *Mullen Scales of Early Learning*. American Guidance Service.

Nowell, K. P., Bernardin, C. J., Brown, C., & Kanne, S. (2021). Characterization of special interests in autism spectrum disorder: A brief review and pilot study using the Special Interests Survey. *Journal of Autism and Developmental Disorders*, 51(8), 2711–2724.

<https://doi.org/10.1007/s10803-020-04743-6>

Parks, K., Schulz, S., McDonnell, C. G., Anagnostou, E., Nicolson, R., Kelley, E., Georgiades, S., Crosbie, J., Schachar, R., Liu, X., & Stevenson, R. (2020). *Sensory processing in ASD and ADHD: A confirmatory factor analysis*. PsyArXiv.

<https://doi.org/10.31234/osf.io/myjbq>

Revelle, W. (1978). ICLUST: A cluster analytic approach to exploratory and confirmatory scale construction. *Behavior Research Methods & Instrumentation*, *10*(5), 739–742.

<https://doi.org/10.3758/BF03205389>

Revelle, W. (2022). *psych: Procedures for Psychological, Psychometric, and Personality Research* (2.2.5) [R Package]. Northwestern University. <https://CRAN.R-project.org/package=psych>

Reynolds, C. R., & Kamphaus, R. W. (2015). *Behavior Assessment System for Children* (3rd ed.). Pearson.

Roid, G. H., Miller, L. J., Pomplun, M., & Koch, C. (2013). *Leiter International Performance Scale* (3rd ed.). Stoelting Company.

Rosenthal, M. Z., Anand, D., Cassiello-Robbins, C., Williams, Z. J., Guetta, R. E., Trumbull, J., & Kelley, L. D. (2021). Development and initial validation of the Duke Misophonia Questionnaire. *Frontiers in Psychology*, *12*, Article 4197.

<https://doi.org/10.3389/fpsyg.2021.709928>

Samajima, F. (1994). Estimation of reliability coefficients using the test information function and its modifications. *Applied Psychological Measurement*, *18*(3), 229–244.

<https://doi.org/10.1177/014662169401800304>

Samejima, F. (1969). Estimation of latent ability using a response pattern of graded scores. *Psychometrika*, *34*(1), 1–97. <https://doi.org/10.1007/bf03372160>

Sapey-Triomphe, L.-A., Moulin, A., Sonié, S., & Schmitz, C. (2018). The Glasgow Sensory Questionnaire: Validation of a French language version and refinement of sensory profiles of people with high autism-spectrum quotient. *Journal of Autism and Developmental Disorders*, *48*(5), 1549–1565. <https://doi.org/10.1007/s10803-017-3422-8>

Schulz, S. E., & Stevenson, R. A. (2019). Sensory hypersensitivity predicts repetitive behaviours in autistic and typically-developing children. *Autism*, 23(4), 1028–1041.

<https://doi.org/10.1177/1362361318774559>

Simpson, K., Adams, D., Alston-Knox, C., Heussler, H. S., & Keen, D. (2019). Exploring the sensory profiles of children on the autism spectrum using the Short Sensory Profile-2 (SSP-2). *Journal of Autism and Developmental Disorders*, 49(5), 2069–2079.

<https://doi.org/10.1007/s10803-019-03889-2>

Sparrow, S. S. (2011). Vineland Adaptive Behavior Scales. In J. S. Kreutzer, J. DeLuca, & B. Caplan (Eds.), *Encyclopedia of clinical neuropsychology* (pp. 2618–2621). Springer.

[https://doi.org/10.1007/978-0-387-79948-3\\_1602](https://doi.org/10.1007/978-0-387-79948-3_1602)

Sparrow, S. S., Balla, D. A., & Cicchetti, D. V. (2005). *Vineland Adaptive Behavior Scales* (2nd ed.). Pearson.

Sparrow, S. S., Cicchetti, D. V., & Saulnier, C. A. (2016). *Vineland Adaptive Behavior Scales* (3rd ed.). Pearson.

Sturm, A., Kuhfeld, M., Kasari, C., & McCracken, J. T. (2017). Development and validation of an item response theory-based Social Responsiveness Scale short form. *Journal of Child Psychology and Psychiatry*, 58(9), 1053–1061. <https://doi.org/10.1111/jcpp.12731>

Tillmann, J., Uljarevic, M., Crawley, D., Dumas, G., Loth, E., Murphy, D., Buitelaar, J., Charman, T., Ahmad, J., Ambrosino, S., Auyeung, B., Baumeister, S., Beckmann, C., Bourgeron, T., Bours, C., Brammer, M., Brandeis, D., Brogna, C., de Bruijn, Y., ... the AIMS-2-TRIALS LEAP group. (2020). Dissecting the phenotypic heterogeneity in sensory features in autism spectrum disorder: A factor mixture modelling approach. *Molecular Autism*, 11(1), Article 67. <https://doi.org/10.1186/s13229-020-00367-w>

- Toland, M. D., Sulis, I., Giambona, F., Porcu, M., & Campbell, J. M. (2017). Introduction to bifactor polytomous item response theory analysis. *Journal of School Psychology, 60*, 41–63. <https://doi.org/10.1016/j.jsp.2016.11.001>
- Tomchek, S. D., Huebner, R. A., & Dunn, W. (2014). Patterns of sensory processing in children with an autism spectrum disorder. *Research in Autism Spectrum Disorders, 8*(9), 1214–1224. <https://doi.org/10.1016/j.rasd.2014.06.006>
- Turner-Brown, L. M., Lam, K. S. L., Holtzclaw, T. N., Dichter, G. S., & Bodfish, J. W. (2011). Phenomenology and measurement of circumscribed interests in autism spectrum disorders. *Autism, 15*(4), 437–456. <https://doi.org/10.1177/1362361310386507>
- Uljarević, M., Frazier, T. W., Jo, B., Scahill, L., Youngstrom, E. A., Spackman, E., Phillips, J. M., Billingham, W., & Hardan, A. (2023). Dimensional Assessment of Restricted and Repetitive Behaviors: Development and preliminary validation of a new measure. *Journal of the American Academy of Child & Adolescent Psychiatry, 62*(5), 568–581. <https://doi.org/10.1016/j.jaac.2022.07.863>
- Uljarević, M., Jo, B., Frazier, T. W., Scahill, L., Youngstrom, E. A., & Hardan, A. Y. (2021). Using the big data approach to clarify the structure of restricted and repetitive behaviors across the most commonly used autism spectrum disorder measures. *Molecular Autism, 12*(1), Article 39. <https://doi.org/10.1186/s13229-021-00419-9>
- Watson, L. R., Patten, E., Baranek, G. T., Poe, M., Boyd, B. A., Freuler, A., & Lorenzi, J. (2011). Differential associations between sensory response patterns and language, social, and communication measures in children with autism or other developmental disabilities. *Journal of Speech, Language, and Hearing Research, 54*(6), 1562–1576. [https://doi.org/10.1044/1092-4388\(2011/10-0029\)](https://doi.org/10.1044/1092-4388(2011/10-0029))
- Wechsler, D. (2011). *Wechsler Abbreviated Scale of Intelligence: WASI-II* (2nd ed.). Pearson.

Wilcox, R. R., & Rousselet, G. A. (2018). A guide to robust statistical methods in neuroscience.

*Current Protocols in Neuroscience*, 82, 8.42.1-8.42.30. <https://doi.org/10.1002/cpns.41>

Williams, Z. J. (2020). Short Sensory Profile in autism. In F. R. Volkmar (Ed.), *Encyclopedia of*

*autism spectrum disorders* (2nd ed., pp. 1–7). Springer. <https://doi.org/10.1007/978-1->

4614-6435-8\_102311-1

Williams, Z. J., Failla, M. D., Gotham, K. O., Woynaroski, T. G., & Cascio, C. (2018).

Psychometric evaluation of the Short Sensory Profile in youth with autism spectrum

disorder. *Journal of Autism and Developmental Disorders*, 48(12), 4231–4249.

<https://doi.org/10.1007/s10803-018-3678-7>
